1 **Phylogenetic barriers to horizontal transfer of antimicrobial peptide resistance genes in the**  
2 **human gut microbiota**

3 Bálint Kintsés<sup>1\*§</sup>, Orsolya Méhi<sup>1§</sup>, Eszter Ari<sup>1,2§</sup>, Mónika Számel<sup>1</sup>, Ádám Györkei<sup>1</sup>, Pramod K.  
4 Jangir<sup>1</sup>, István Nagy<sup>3,4</sup>, Ferenc Pál<sup>1</sup>, Gergő Fekete<sup>1</sup>, Roland Tengölics<sup>1</sup>, Ákos Nyerges<sup>1</sup>, István  
5 Likó<sup>5</sup>, Balázs Bálint<sup>3</sup>, Bálint Márk Vásárhelyi<sup>3</sup>, Misshelle Bustamante<sup>2</sup>,  
6 Balázs Papp<sup>1\*</sup> & Csaba Pál<sup>1\*</sup>

7  
8 <sup>1</sup>Synthetic and System Biology Unit, Institute of Biochemistry, Biological Research Centre of the  
9 Hungarian Academy of Sciences, 6726 Szeged, Hungary.

10 <sup>2</sup>Department of Genetics, Eötvös Loránd University, 1117 Budapest, Hungary.

11 <sup>3</sup>SeqOmics Biotechnology Ltd., 6782 Mórahalom, Hungary.

12 <sup>4</sup>Sequencing Platform, Institute of Biochemistry, Biological Research Centre of the Hungarian  
13 Academy of Sciences, 6726 Szeged, Hungary.

14 <sup>5</sup>II. Department of Internal Medicine, Semmelweis University, Faculty of Medicine, 1088 Budapest,  
15 Hungary.

16 \*Correspondence to [cpal@brc.hu](mailto:cpal@brc.hu), [pappb@brc.hu](mailto:pappb@brc.hu) or [kintses.balint@brc.mta.hu](mailto:kintses.balint@brc.mta.hu)

17 §These authors contributed equally to this work.

18

19

## 20 **Abstract**

21 The human gut microbiota has adapted to the presence of antimicrobial peptides (AMPs) that are  
22 ancient components of immune defence. Despite important medical relevance, it has remained  
23 unclear whether AMP resistance genes in the gut microbiome are available for genetic exchange  
24 between bacterial species. Here we show that AMP- and antibiotic-resistance genes differ in their  
25 mobilization patterns and functional compatibilities with new bacterial hosts. First, whereas AMP  
26 resistance genes are widespread in the gut microbiome, their rate of horizontal transfer is lower  
27 than that of antibiotic resistance genes. Second, gut microbiota culturing and functional  
28 metagenomics revealed that AMP resistance genes originating from phylogenetically distant  
29 bacteria only have a limited potential to confer resistance in *Escherichia coli*, an intrinsically  
30 susceptible species. Third, the phenotypic impact of acquired AMP resistance genes heavily  
31 depends on the genetic background of the recipient bacteria. Taken together, functional  
32 compatibility with the new bacterial host emerges as a key factor limiting the genetic exchange of  
33 AMP resistance genes. Finally, our results suggest that AMPs induce highly specific changes in  
34 the composition of the human microbiota with implications for disease risks.

35

## 36 **Introduction**

37

38 The maintenance of homeostasis between the gut microbiota and the human host tissues  
39 entails a complex co-evolutionary relationship<sup>1,2</sup>. Specialized cells in the intestinal epithelium  
40 restrict microbes to the lumen, control the composition of commensal inhabitants, and ensure  
41 removal of pathogens<sup>3,4</sup>. Cationic host antimicrobial peptides (AMPs) have crucial roles in this  
42 process<sup>5</sup>. They are among the most ancient and efficient components of the innate immune  
43 defence in multicellular organisms and have retained their efficacy for millions of years<sup>5,6</sup>. As AMPs  
44 have a broad spectrum of activity, much effort has been put into finding potential novel  
45 antibacterial drugs among AMPs<sup>7,8</sup>.

46 However, therapeutic use of AMPs may drive bacterial evolution of resistance to our own  
47 immunity peptides<sup>9,10</sup>. Therefore, it is of central importance to establish whether AMP resistance  
48 genes in the gut microbiome are available for genetic exchange with other bacterial species.

49 Several lines of observation support the plausibility of this scenario. The gut bacterial community is  
50 a rich source of mobile antibiotic resistance genes<sup>11</sup>, and certain abundant gut bacterial species  
51 exhibit high levels of intrinsic resistance to AMPs<sup>12</sup>. Moreover, even single genes can confer high  
52 AMP resistance in Bacteroidetes<sup>12</sup>. However, beyond the recent discovery of a horizontally  
53 spreading resistance gene family<sup>13,14</sup>, the mobility of AMP resistance-encoding genes across  
54 bacterial species has remained a *terra incognita*.

55 Here, we applied an integrated approach to systematically characterize the mobilization  
56 potential of the AMP resistance gene reservoir in the human gut microbiome. First, we examined  
57 the patterns of horizontal gene transfer events involving AMP resistance genes by analyzing  
58 bacterial genome sequences from the human gut. Next, we experimentally probed the functional  
59 compatibility of these AMP resistance genes with a susceptible host, *E. coli*, by performing  
60 functional metagenomic selections in the presence of diverse AMPs. By comparing these results  
61 with those obtained for a set of clinically relevant small-molecule antibiotics with well-characterized  
62 resistomes, we found that AMP resistance genes are less frequently mobilized and have a lower  
63 potential to confer resistance in a phylogenetically distant new host. Finally, we demonstrated that  
64 the phenotypic impact of acquiring AMP resistance genes frequently depends on the host's genetic  
65 background. Overall, these findings indicate that lack of functional compatibility of AMP resistance  
66 genes with new bacterial hosts limits their mobility in the gut microbiota.

67

## 68 **Results**

69

### 70 **Infrequent horizontal transfer of AMP resistance genes in the gut microbiota**

71 We begin by asking whether the genetic determinants of resistance to AMPs and  
72 antibiotics, respectively, differ in their rate of horizontal transfer in the human gut microbiota. To  
73 systematically address this issue, we first collected a comprehensive set of previously  
74 characterized AMP- and antibiotic-resistance genes from literature and databases, yielding a  
75 comprehensive catalogue of 105 and 200 AMP- and antibiotic-resistance gene families,  
76 respectively (see Methods and Table S1). Next, we compared the frequencies of these previously  
77 identified resistance genes in a catalogue of 37,853 horizontally transferred genes from 567

78 genome sequences of phylogenetically diverse bacterial species in the human gut microbiota<sup>15</sup>.  
79 This mobile gene catalogue relies on the identification of nearly identical genes that are shared by  
80 distantly related bacterial genomes and thereby provides a snapshot on the gene set subjected to  
81 recent horizontal gene transfer events in a representative sample of the human gut microbiome<sup>15</sup>.  
82 We identified homologs of the literature-curated resistance genes for which at least one transfer  
83 event was reported (i.e., those present in the mobile gene pool; see Methods and Table S2).  
84 We found that the relative frequency of AMP resistance genes within the pool of mobile genes was  
85 6-fold lower than that of antibiotic resistance genes, in spite of their similar frequencies in the  
86 genomes of the gut microbiota (Figure 1A, Table S2). Moreover, the unique transferred genes  
87 were shared between fewer bacterial species, indicating fewer transfer events per gene (Figure  
88 1B). Overall, these results suggest that AMP resistance genes are less frequently transferred  
89 across bacterial species in the human gut.

#### 90 **Short genomic fragments from the gut microbiota rarely confer AMP resistance**

91 One possible reason for the low mobilization of AMP resistance genes could be that AMP  
92 resistance is an intrinsic property of certain bacteria shaped by multi-gene networks<sup>16</sup>. Genes  
93 involved in AMP resistance may display strong epistatic interactions, and therefore they may have  
94 little or no impact on resistance individually. If it was so, horizontal gene transfer of single genes or  
95 transcriptional units encoded by short genomic fragments would not provide resistance in the  
96 recipient bacterial species. Indeed, AMPs interact with the cell membrane, a highly interconnected  
97 cellular structure, and membership in complex cellular subsystems has been shown to limit  
98 horizontal gene transfer<sup>17,18</sup>.

99 To investigate this scenario, we experimentally compared the ability of short genomic  
100 fragments to transfer resistance phenotypes towards AMPs versus antibiotics. To this end, we  
101 applied an established functional metagenomic protocol<sup>11,19</sup> to identify random 1-5 kb long DNA  
102 fragments in the gut microbiome that confer resistance to an intrinsically susceptible *Escherichia*  
103 *coli* strain. Importantly, the length distributions of the known AMP- and antibiotic-resistance genes  
104 are well within this fragment size range (Figure S1), indicating that our protocol is suitable to

105 capture single resistance genes for both AMPs and antibiotics. Metagenomic DNA from human gut  
106 faecal samples was isolated from two unrelated, healthy individuals who have not taken any  
107 antibiotics for at least one year. The resulting DNA samples were cut and fragments between 1-5  
108 kb were shotgun cloned into a plasmid to express the genetic information in *Escherichia coli* K-12.  
109 About 2 million members from each library, corresponding to a total coverage of 8 Gb (the size of  
110 ~200 bacterial genomes), were then selected on solid culture medium in the presence of one of 12  
111 diverse AMPs and 11 antibiotics at concentrations where the wild-type host strain is susceptible  
112 (Table S3). Finally, using a third-generation long-read sequencing pipeline<sup>20</sup>, the number of unique  
113 DNA fragments conferring resistance (i.e. resistance contigs) was determined.

114 In agreement with prior studies<sup>11,21</sup>, multiple resistant clones emerged against all tested  
115 antibiotics (Figure 2A, Table S4). In sharp contrast, no resistance was conferred against half of the  
116 AMPs tested, and, in general, the number of unique AMP resistance contigs was substantially  
117 lower than the number of unique antibiotic resistance contigs (Figure 2A, Table S4). Polymyxin B –  
118 an antimicrobial peptide used as a last-resort drug in the treatment of multidrug-resistant Gram-  
119 negative bacterial infections<sup>22</sup> – is a notable exception to this trend, with a relatively high number of  
120 unique resistance contigs (Figure 2A). Indeed, a resistance gene (*mcr-1*) against Polymyxin B is  
121 rapidly spreading horizontally worldwide, representing an alarming global healthcare issue<sup>23</sup>. In  
122 contrast to Polymyxin B, we detected only one unique contig conferring resistance to LL37, a  
123 human AMP abundantly secreted in the intestinal epithelium<sup>24</sup> (Table S4). The specific AMP  
124 resistance genes on the resistance contigs are involved in cell surface modification, peptide  
125 proteolysis and regulation of outer membrane stress response (Table 1, Table S4 and Figure S2).

126 If lack of functional compatibility with the host cell prevents AMP resistance genes from  
127 exerting their phenotypic effects, then DNA fragments identified in our screen should more often  
128 come from phylogenetically closely related bacteria. 53% of the contigs showed over 95%  
129 sequence identity to bacterial genome sequences from the HMP database<sup>25</sup> (see Methods, Figure  
130 S3), allowing us to infer the source taxa with high accuracy (Table S4). Indeed, AMP resistance  
131 contigs originating from Proteobacteria, which are phylogenetically close relatives of the host *E.*

132 *coli*, were overrepresented (Figure 2B). Notably, this trend was not driven by polymyxin B only but  
133 was valid for the rest of the AMPs as well (Figure S4).

134 Whereas these patterns are consistent with the hypothesis that the genetic determinants of  
135 AMP resistance are difficult to transfer via short genomic fragments owing to a lack of functional  
136 compatibility with the new host, another explanation is also plausible. In particular, AMP resistant  
137 bacteria might be relatively rare in the human gut microbiota, therefore, AMP resistance genes  
138 from these bacteria might simply remain undetected. However, as explained below, we can rule  
139 out this alternative hypothesis.

140

#### 141 **AMP-resistant gut bacteria are abundant and phylogenetically diverse**

142 To assess the diversity and the taxonomic composition of gut bacteria displaying resistance  
143 to AMPs and antibiotics, we carried out anaerobic cultivations and selections of the gut microbiota  
144 using a state-of-the-art protocol<sup>26</sup>. To this end, faecal samples were collected from 7 healthy  
145 individuals (i.e. Fecal 7 mix, see Methods). As expected<sup>26</sup>, the cultivation protocol allowed  
146 representative sampling of the gut microbiota: we could cultivate 65-74% of the gut microbial  
147 community at the family level in the absence of any drug treatment (Figure S5, Table S5). Next,  
148 the same faecal samples were cultivated in the presence of one of 5-5 representative AMPs and  
149 antibiotics, respectively (Table S6). We applied drug dosages that retained 0.01 to 0.1% of the  
150 total cell populations from untreated cultivations (Table S6) and assessed the taxonomic  
151 composition of these cultures by 16S rRNA sequencing (see Methods).

152 Remarkably, the diversities of the AMP-treated and the untreated bacterial cultures did not  
153 differ significantly from each other (Figure 3A), despite marked differences in their taxonomic  
154 compositions (Figure 3B). AMP-treated samples contained several bacterial families from the  
155 Firmicutes and Actinobacteria phyla, which are phylogenetically distant from *E. coli* (Figure 3C).  
156 Notably, exposure to AMP stress provided a competitive growth advantage to bacterial families  
157 that remained undetected in the untreated samples (Figure 3C). The examples include  
158 Desulfovibrionaceae, a clinically relevant family that is linked to ulcerative colitis<sup>27</sup> – an  
159 inflammatory condition with elevated AMP levels<sup>28</sup> (Figure 3C). In sharp contrast, the diversity of

160 antibiotic-treated cultures dropped significantly compared to both the untreated and the AMP-  
161 treated cultures (Figure 3A and Figure S6). Several bacterial families had a significantly lower  
162 abundance in the antibiotic-treated cultures than in the untreated ones (Figure 3C). These results  
163 indicate that the human gut is inhabited by taxonomically diverse bacteria that exhibit intrinsic  
164 resistance to AMPs.

### 165 **Human microbiota harbours a large reservoir of AMP resistance genes**

166 Next, we assessed if the high taxonomic diversity in the AMP-resistant microbiota  
167 corresponds to a diverse reservoir of AMP resistance genes. To this end, we annotated previously  
168 identified AMP- and antibiotic-resistance genes in a set of gut bacterial genomes<sup>15</sup> representing  
169 bacterial families that were detected in our culturing experiments upon AMP- and antibiotic-  
170 selection, respectively (Figure 3C, for details, see Methods). Remarkably, 65% of our literature  
171 curated AMP resistance gene families (Table S1) were represented in at least one of these  
172 genomes (Table S2), which is similar to that of antibiotic resistance gene families (58%). Finally,  
173 AMP resistance gene families, on average, were 32% more widespread in these species than the  
174 same figure for antibiotic resistance genes (Figure S7). Thus, the human gut harbours diverse  
175 AMP-resistant bacteria and a large reservoir of AMP resistance genes.

### 176 **Phylogenetic constraints on the functional compatibility of AMP resistance genes**

177 We next directly tested whether the shortage of AMP resistance DNA fragments from  
178 distantly related bacteria can be explained by the low potential of genomic fragments to transfer  
179 AMP resistance phenotypes to *E. coli*. To this end, we constructed metagenomic libraries from the  
180 AMP- and antibiotic-resistant microbiota cultures. From each AMP and antibiotic treatments, two  
181 biological replicates were generated (see Methods), resulting in 10-10 libraries, covering 25.6 Gb  
182 and 14 Gb DNA, respectively (Table S7). These metagenomic libraries were next screened on the  
183 corresponding AMP- or antibiotic-containing solid medium. Finally, the phylogenetic sources of the  
184 resulting AMP- and antibiotic-resistance contigs were inferred (Figure S8, Table S8). Compared to  
185 their relative frequencies in the drug-treated cultured microbiota, the phylogenetically close  
186 Proteobacteria contributed disproportionately more AMP- than antibiotic-resistance DNA fragments,  
187 whereas the opposite pattern was seen for the distantly related Firmicutes (Figure 3D, Table S9).



188 Taken together, phylogenetically diverse gut bacterial species show AMP resistance, but there is a  
189 shortage of transferable AMP resistance DNA fragments from phylogenetically distant relatives of  
190 *E. coli*.

### 191 **Pervasive genetic background dependence of AMP resistance genes**

192 Finally, we present evidence that DNA fragments that confer resistance to AMPs and were  
193 isolated from our screens show stronger genetic background dependence than those conferring  
194 resistance to antibiotics.

195 To test the generality of genetic background-dependency of AMP resistance genes, we  
196 examined how DNA fragments that provide AMP- or antibiotic-resistance in *E. coli* influence drug  
197 susceptibility in a related Enterobacter species, *Salmonella enterica*. We analyzed a representative  
198 set of 41 resistance DNA fragments derived from our screens (Table S10) by measuring the levels  
199 of resistance provided by them in both *E. coli* and *S. enterica*. Strikingly, while 88% of the antibiotic  
200 resistance DNA fragments provided resistance in both host species, only 38.9% of AMP resistance  
201 DNA fragments did so (Figure 4A, Table S10). Thus, the phenotypic effect of AMP resistance  
202 genes frequently depends on the genetic background, even when closely related hosts are  
203 compared.

204 As an example, we finally focused on a putative ortholog of a previously characterized AMP  
205 resistance gene, *lpxF*<sup>12</sup>. LpxF is a key determinant of AMP resistance in Bacteroidetes, a member  
206 of the human gut microbiota. By decreasing the net negative surface charge of the bacterial cell, it  
207 provides a 5000-fold increment in Polymyxin B resistance in these species<sup>12,29</sup>. To test the genetic  
208 background dependence of this resistance gene, we expressed the *lpxF* ortholog in *E. coli* and we  
209 found that it provides a mere five-fold increase in Polymyxin B resistance (Figure 4B).  
210 Reassuringly, surface charge measurements proved that this *lpxF* is fully functional in *E. coli*  
211 (Figure 4C, Figure S9). The compromised resistance phenotype conferred by *lpxF* in the new host  
212 shows that the function of other genes is also required to achieve the high AMP resistance level  
213 seen in the original host.

214



## 215 Discussion

216 This work systematically investigated the mobility of AMP versus antibiotic resistance  
217 genes in the gut microbiome. We report that AMP resistance genes are less frequently transferred  
218 between members of the gut microbiota than antibiotic resistance genes (Figure 1). In principle,  
219 this pattern could be explained by at least two independent factors: shortage of relevant selection  
220 regimes during the recent evolutionary history of the gut microbiota and lack of functional  
221 compatibility of AMP resistance genes upon transfer to a new host. We focused on testing the  
222 second possibility due to its experimental tractability and relevance to forecast the mobility of  
223 resistance genes upon AMP treatment. In a series of experiments, we showed that  
224 phylogenetically diverse gut bacteria display high levels of AMP resistance (Figure 3), yet the  
225 underlying resistance genes often fail to confer resistance upon transfer to *E. coli* (Figure 2 and  
226 Figure 3). Furthermore, we demonstrated that the AMP resistance conferred by genomic  
227 fragments often depends on the genetic background of the recipient bacterium (Figure 4).  
228 Together, these results support the notion that horizontal acquisition of AMP resistance is  
229 constrained by phylogenetic barriers owing to functional incompatibility with the new host cell<sup>30</sup>. We  
230 speculate that the large differences in functional compatibility between antibiotic- and AMP-  
231 resistance genes might be caused by the latter being more often parts of highly interconnected  
232 cellular subsystems, such as cell envelope biosynthesis pathways. Clearly, deciphering the  
233 biochemical underpinning of functional incompatibility remains an area for future research.

234 We note that compromised benefit may not be the only manifestation of functional  
235 incompatibility and the exclusive reason for the limited presence of AMP resistance genes in the  
236 mobile gene pool (Figure 1). It is also plausible that some AMP resistance genes have severe  
237 deleterious side effects in the new host in addition to conferring a compromised resistance. For  
238 example, the introduction of *lpxF* into bacterial pathogens reduces virulence in mice, probably  
239 because it perturbs the stability of the bacterial outer membrane in enterobacterial species<sup>31</sup>.  
240 Indeed, LpxF increases the sensitivity of *E. coli* to bile acid, a membrane-damaging agent secreted  
241 into the gut of vertebrates (Figure S10). Future works should elucidate whether AMP resistance  
242 genes are especially prone to induce deleterious side effects compared to antibiotic resistance  
243 ones.

244 An important and unresolved issue is why natural AMPs that are part of the human innate  
245 immune system have remained effective for millions of years without detectable resistance in  
246 several bacterial species. One possibility, supported by our work, is that the acquisition of  
247 resistance through horizontal gene transfer from human gut bacteria is limited, most likely due to  
248 compromised functional compatibility in the recipient bacteria. We do not wish to claim, however,  
249 that AMPs in clinical use would generally be resistance-free. In agreement with the prevalence of  
250 Polymyxin B resistance DNA fragments (Figure 2A), a plasmid conferring colistin resistance is  
251 spreading globally<sup>32</sup>. Rather, our work highlights major differences in the frequencies and the  
252 mechanisms of resistance across AMPs, with the ultimate aim to identify antimicrobial agents less  
253 prone to resistance. Finally, our results highlight a previously ignored potential problem with the  
254 clinical usage of AMPs. Our work indicates that upon various AMP stresses, the abundance of  
255 bacterial families traditionally associated with inflammatory bowel diseases (e.g.  
256 Desulfovibrionaceae) increases (Figure 3C). Future works should examine whether AMP stress  
257 increases the risk of human diseases by specifically perturbing the human microbiota composition.  
258  
259

260 **References and Notes:**

- 261 1. Dethlefsen, L., McFall-Ngai, M. & Relman, D. A. An ecological and evolutionary perspective  
262 on human–microbe mutualism and disease. *Nature* **449**, 811–818 (2007).
- 263 2. Nicholson, J. K. *et al.* Host-gut microbiota metabolic interactions. *Science* **336**, 1262–1267  
264 (2012).
- 265 3. Littman, D. R. & Pamer, E. G. Role of the Commensal Microbiota in Normal and Pathogenic  
266 Host Immune Responses. *Cell Host Microbe* **10**, 311–323 (2011).
- 267 4. Round, J. L. & Mazmanian, S. K. The gut microbiota shapes intestinal immune responses  
268 during health and disease. *Nat. Rev. Immunol.* **9**, 600–600 (2009).
- 269 5. Zasloff, M. Antimicrobial peptides of multicellular organisms. *Nature* **415**, 389–395 (2002).
- 270 6. Peschel, A. & Sahl, H. G. The co-evolution of host cationic antimicrobial peptides and  
271 microbial resistance. *Nat Rev Microbiol* **4**, 529–536 (2006).
- 272 7. Hancock, R. & Patrzykat, A. Clinical Development of Cationic Antimicrobial Peptides: From  
273 Natural to Novel Antibiotics. *Curr. Drug Target -Infectious Disord.* **2**, 79–83 (2002).
- 274 8. Hancock, R. E. W. & Sahl, H.-G. Antimicrobial and host-defense peptides as new anti-  
275 infective therapeutic strategies. *Nat. Biotechnol.* **24**, 1551-7 (2006).
- 276 9. Kubicek-Sutherland, J. Z. *et al.* Antimicrobial peptide exposure selects for *Staphylococcus*  
277 *aureus* resistance to human defence peptides. *J. Antimicrob. Chemother.* **72**, 115–127  
278 (2017).
- 279 10. Andersson, D. I., Hughes, D. & Kubicek-Sutherland, J. Z. Mechanisms and consequences  
280 of bacterial resistance to antimicrobial peptides. *Drug Resist. Updat.* **26**, 43–57 (2016).
- 281 11. Sommer, M. O. A., Dantas, G. & Church, G. M. Functional Characterization of the Antibiotic  
282 Resistance Reservoir in the Human Microflora. *Science* **325**, 1128–1131 (2009).
- 283 12. Cullen, T. W. *et al.* Gut microbiota. Antimicrobial peptide resistance mediates resilience of  
284 prominent gut commensals during inflammation. *Science* **347**, 170–5 (2015).
- 285 13. Liu, Y.-Y. *et al.* Emergence of plasmid-mediated colistin resistance mechanism MCR-1 in

- 286 animals and human beings in China: a microbiological and molecular biological study.  
287 *Lancet Infect. Dis.* **16**, 161–168 (2016).
- 288 14. Chen, L. *et al.* Newly identified colistin resistance genes, mcr-4 and mcr-5, from upper and  
289 lower alimentary tract of pigs and poultry in China. *PLoS One* **13**, e0193957 (2018).
- 290 15. Brito, I. L. *et al.* Mobile genes in the human microbiome are structured from global to  
291 individual scales. *Nature* **535**, 435–439 (2016).
- 292 16. Andersson, D. I., Hughes, D. & Kubicek-Sutherland, J. Z. Mechanisms and consequences  
293 of bacterial resistance to antimicrobial peptides. *Drug Resist. Updat.* **26**, 43–57 (2016).
- 294 17. Jain, R., Rivera, M. C. & Lake, J. A. Horizontal gene transfer among genomes: the  
295 complexity hypothesis. *Proc. Natl. Acad. Sci. U. S. A.* **96**, 3801–6 (1999).
- 296 18. Cohen, O., Gophna, U. & Pupko, T. The Complexity Hypothesis Revisited: Connectivity  
297 Rather Than Function Constitutes a Barrier to Horizontal Gene Transfer. *Mol. Biol. Evol.* **28**,  
298 1481–1489 (2011).
- 299 19. Forsberg, K. J. *et al.* Bacterial phylogeny structures soil resistomes across habitats. *Nature*  
300 **509**, 612–616 (2014).
- 301 20. van der Helm, E. *et al.* Rapid resistome mapping using nanopore sequencing. *Nucleic Acids*  
302 *Res.* **45**, e61 (2017).
- 303 21. Hu, Y. *et al.* Metagenome-wide analysis of antibiotic resistance genes in a large cohort of  
304 human gut microbiota. *Nat. Commun.* **4**, 2151 (2013).
- 305 22. Kaye, K. S., Pogue, J. M., Tran, T. B., Nation, R. L. & Li, J. Agents of Last Resort. *Infect.*  
306 *Dis. Clin. North Am.* **30**, 391–414 (2016).
- 307 23. Zhi, C., Lv, L., Yu, L.-F., Doi, Y. & Liu, J.-H. Dissemination of the mcr-1 colistin resistance  
308 gene. *Lancet Infect. Dis.* **16**, 292–293 (2016).
- 309 24. Dürr, U. H. N., Sudheendra, U. S. & Ramamoorthy, A. LL-37, the only human member of the  
310 cathelicidin family of antimicrobial peptides. **1758**(9), 1408–25 (2006).
- 311 25. Methé, B. A. *et al.* A framework for human microbiome research. *Nature* **486**, 215–221

- 312 (2012).
- 313 26. Rettedal, E. A., Gumpert, H. & Sommer, M. O. A. Cultivation-based multiplex phenotyping of  
314 human gut microbiota allows targeted recovery of previously uncultured bacteria. *Nat.*  
315 *Commun.* **5**, 4714 (2014).
- 316 27. Rowan, F., Docherty, N. & Murphy, M. Desulfovibrio bacterial species are increased in  
317 ulcerative colitis. *Dis. Colon* **53**(11), 1530-6 (2010).
- 318 28. Wehkamp, J. *et al.* Inducible and Constitutive  $\beta$ -Defensins Are Differentially Expressed in  
319 Crohn's Disease and Ulcerative Colitis. *Inflamm. Bowel Dis.* **9**, 215–223 (2003).
- 320 29. Coats, S. R., To, T. T., Jain, S., Braham, P. H. & Darveau, R. P. Porphyromonas gingivalis  
321 Resistance to Polymyxin B Is Determined by the Lipid A 4'-Phosphatase, PGN\_0524. *Int. J.*  
322 *Oral Sci.* **1**, 126–135 (2009).
- 323 30. Porse, A., Schou, T. S., Munck, C., Ellabaan, M. M. H. & Sommer, M. O. A. Biochemical  
324 mechanisms determine the functional compatibility of heterologous genes. *Nat. Commun.* **9**,  
325 522 (2018).
- 326 31. Kong, Q. *et al.* Phosphate groups of lipid A are essential for Salmonella enterica serovar  
327 Typhimurium virulence and affect innate and adaptive immunity. *Infect. Immun.* **80**, 3215–24  
328 (2012).
- 329 32. Wang, R. *et al.* The global distribution and spread of the mobilized colistin resistance gene  
330 mcr-1. *Nat. Commun.* **9**, 1179 (2018).
- 331 33. Lozupone, C. A., Hamady, M., Kelley, S. T. & Knight, R. Quantitative and  
332 Qualitative Diversity Measures Lead to Different Insights into Factors That Structure  
333 Microbial Communities. *Appl. Environ. Microbiol.* **73**, 1576–1585 (2007).
- 334 34. Huerta-Cepas, J., Serra, F. & Bork, P. ETE 3: Reconstruction, Analysis, and Visualization of  
335 Phylogenomic Data. *Mol. Biol. Evol.* **33**, 1635–8 (2016).
- 336 35. McArthur, A. G. *et al.* The comprehensive antibiotic resistance database. *Antimicrob. Agents*  
337 *Chemother.* **57**, 3348–57 (2013).

- 338 36. Hyatt, D. *et al.* Prodigal: prokaryotic gene recognition and translation initiation site  
339 identification. *BMC Bioinformatics* **11**, 119 (2010).
- 340 37. Buchfink, B., Xie, C. & Huson, D. H. Fast and sensitive protein alignment using DIAMOND.  
341 *Nat. Methods* **12**, 59–60 (2015).
- 342 38. Quast, C. *et al.* The SILVA ribosomal RNA gene database project: improved data  
343 processing and web-based tools. *Nucleic Acids Res.* **41**, D590–D596 (2012).
- 344 39. Lagesen, K. *et al.* RNAmmer: consistent and rapid annotation of ribosomal RNA genes.  
345 *Nucleic Acids Res.* **35**, 3100–8 (2007).
- 346 40. Sambrook, J. & Russell, D. W. (David W. *Molecular cloning: a laboratory manual.* (Cold  
347 Spring Harbor Laboratory Press, 2001).
- 348 41. Szybalski, W. Genetic studies on microbial cross resistance to toxic agents. IV. Cross  
349 resistance of *Bacillus megaterium* to forty-four antimicrobial drugs. *Appl. Microbiol.* **2**, 57–63  
350 (1954).
- 351 42. Wiegand, I., Hilpert, K. & Hancock, R. E. W. Agar and broth dilution methods to determine  
352 the minimal inhibitory concentration (MIC) of antimicrobial substances. *Nat. Protoc.* **3**, 163–  
353 175 (2008).
- 354 43. Rhoads, A. & Au, K. F. PacBio Sequencing and Its Applications. *Genomics. Proteomics*  
355 *Bioinformatics* **13**, 278–289 (2015).
- 356 44. Seemann, T. Prokka: rapid prokaryotic genome annotation. *Bioinformatics* **30**, 2068–2069  
357 (2014).
- 358 45. Altschul, S. F. *et al.* Gapped BLAST and PSI-BLAST: a new generation of protein database  
359 search programs. *Nucleic Acids Res.* **25**, 3389–402 (1997).
- 360 46. Kozich, J. J., Westcott, S. L., Baxter, N. T., Highlander, S. K. & Schloss, P. D. Development  
361 of a dual-index sequencing strategy and curation pipeline for analyzing amplicon sequence  
362 data on the miseq illumina sequencing platform. *Appl. Environ. Microbiol.* **79**, 5112–5120  
363 (2013).

- 364 47. Schloss, P. D. *et al.* Introducing mothur: open-source, platform-independent, community-  
365 supported software for describing and comparing microbial communities. *Appl. Environ.*  
366 *Microbiol.* **75**, 7537–41 (2009).
- 367 48. Oksanen, J. *et al.* Title Community Ecology Package. (2017).
- 368 49. Chakravorty, S., Helb, D., Burday, M., Connell, N. & Alland, D. A detailed analysis of 16S  
369 ribosomal RNA gene segments for the diagnosis of pathogenic bacteria. *J. Microbiol.*  
370 *Methods* **69**, 330–339 (2007).
- 371 50. McMurdie, P. J. & Holmes, S. phyloseq: An R Package for Reproducible Interactive Analysis  
372 and Graphics of Microbiome Census Data. *PLoS One* **8**, e61217 (2013).
- 373 51. McCarthy, D. J., Chen, Y. & Smyth, G. K. Differential expression analysis of multifactor  
374 RNA-Seq experiments with respect to biological variation. *Nucleic Acids Res.* **40**, 4288–  
375 4297 (2012).
- 376 52. Jonsson, V., Österlund, T., Nerman, O. & Kristiansson, E. Statistical evaluation of methods  
377 for identification of differentially abundant genes in comparative metagenomics. *BMC*  
378 *Genomics* **17**, 78 (2016).
- 379 53. Robinson, M. D. & Oshlack, A. A scaling normalization method for differential expression  
380 analysis of RNA-seq data. *Genome Biol.* **11**, R25 (2010).
- 381 54. Benjamini, Y. & Hochberg, Y. Controlling the False Discovery Rate: A Practical and  
382 Powerful Approach to Multiple Testing. *Source J. R. Stat. Soc. Ser. B* **57**, 289–300 (1995).
- 383 55. Wang, X., McGrath, S. C., Cotter, R. J. & Raetz, C. R. H. Expression cloning and  
384 periplasmic orientation of the *Francisella novicida* lipid A 4'-phosphatase LpxF. *J. Biol.*  
385 *Chem.* **281**, 9321–30 (2006).
- 386 56. Rossetti, F. F. *et al.* Interaction of poly(L-lysine)-g-poly(ethylene glycol) with supported  
387 phospholipid bilayers. *Biophys. J.* **87**, 1711–21 (2004).
- 388 57. Bacic, M. K. & Smith, C. J. Laboratory maintenance and cultivation of bacteroides species.  
389 *Curr. Protoc. Microbiol.* **Chapter 13**, Unit 13C.1 (2008).



- 390 58. Fisher, R. A., Corbet, A. S. & Williams, C. B. The Relation Between the Number of Species  
391 and the Number of Individuals in a Random Sample of an Animal Population. *J. Anim. Ecol.*  
392 **12**, 42 (1943).
- 393 59. Simpson, E. H. Measurement of Diversity. *Nature* **163**, 688–688 (1949).
- 394 60. Ingram, B. O., Masoudi, A. & Raetz, C. R. H. *Escherichia coli* Mutants That Synthesize  
395 Dephosphorylated Lipid A Molecules. *Biochemistry* **49**, 8325–8337 (2010).
- 396

397

398 **Acknowledgements**

399 We thank Dezső Módos, Dávid Fazekas, József Sóki and Edit Urbán for their technical support.

400 Funding: This work was supported by the 'Lendület' programme of the Hungarian Academy of

401 Sciences (B.P. and C.P.), the Wellcome Trust (B.P.), H2020-ERC-2014-CoG (C.P.), GINOP-

402 2.3.2-15-2016-00014 (EVOMER, C.P. and B.P.) and GINOP-2.3.2-15-2016-00020 (MolMedEx

403 TUMORDNS, C.P.), NKFIH grant K120220 (B.K.), NKFIH grant FK124254 (O.M.). BK holds a

404 Bolyai Janos Scholarship.

405 Data and materials availability: All data is available in the main text or the supplementary materials.

406

407

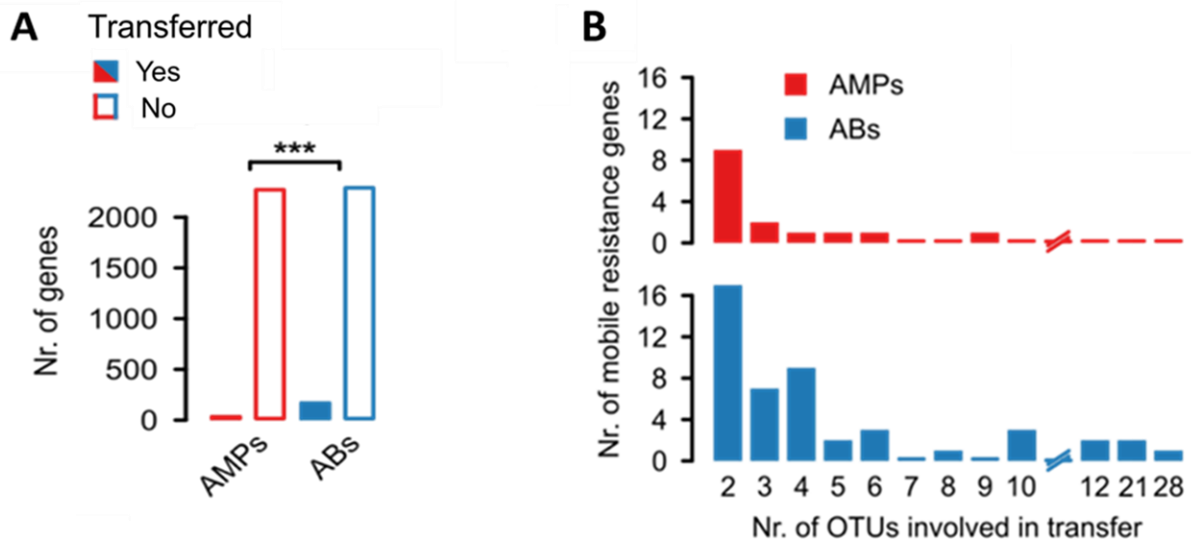

408  
409

410 **Figure 1. AMP resistance genes are less frequently transferred in the human gut**  
411 **microbiome than antibiotic resistance genes. A)** The number of the known AMP- (red bars) and  
412 antibiotic-resistance genes (blue bars) from the gut microbiome that are transferred (filled bars) /  
413 not transferred (empty bars). Known resistance genes were identified using blast sequence  
414 similarity searches (see Methods). \*\*\* indicates significant difference ( $P = 10^{-24}$ , two-tailed Fisher's  
415 exact test,  $n=4714$ ). **B)** Unique mobile AMP resistance genes (red bars) were involved in only  
416 approximately half as many between-species transfer events as antibiotic resistance genes  
417 ( $P=0.03$ , two-sided negative binomial regression,  $n=45$  (AMPs) and  $n=251$  (ABs)).

418

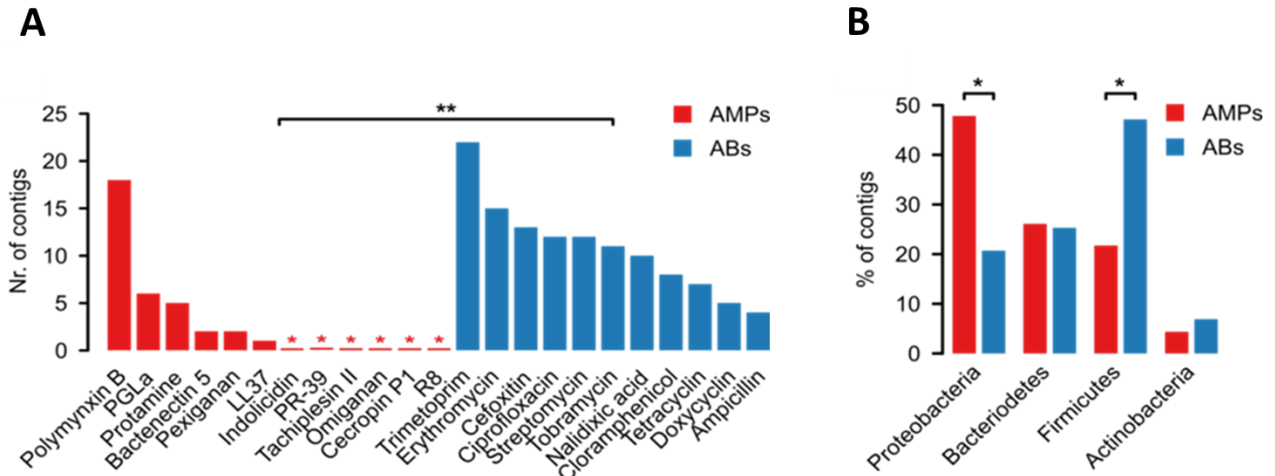

419

420

421

422

423

424

425

426

427

428

429

430

**Figure 2. In *E. coli*, genomic fragments from the human gut microbiota confer AMP resistance less frequently than antibiotic resistance. A)** Functional selection of metagenomic libraries with 12 AMPs (red bars) resulted in fewer distinct resistance-conferring DNA contigs than with 11 conventional small-molecule antibiotics (ABs, blue bars;  $P=0.002$ , two-sided negative binomial regression,  $n=34$  (AMPs),  $n=119$  (ABs)). Red asterisks indicate zero values and \*\* indicates a significant difference between AMPs and antibiotics. **B)** Phylum-level distribution (%) of the AMP- (red bars) and antibiotic-resistance contigs (blue bars). In the case of AMPs, significantly more resistance contigs are originating from the Proteobacteria phylum ( $P=0.015$ , two-tailed Fisher's exact test,  $n=110$ ), while contigs originating from phylogenetically distant relatives of the host *E. coli* from Firmicutes phylum are underrepresented ( $P=0.033$ , two-tailed Fisher's exact test,  $n=110$ ).

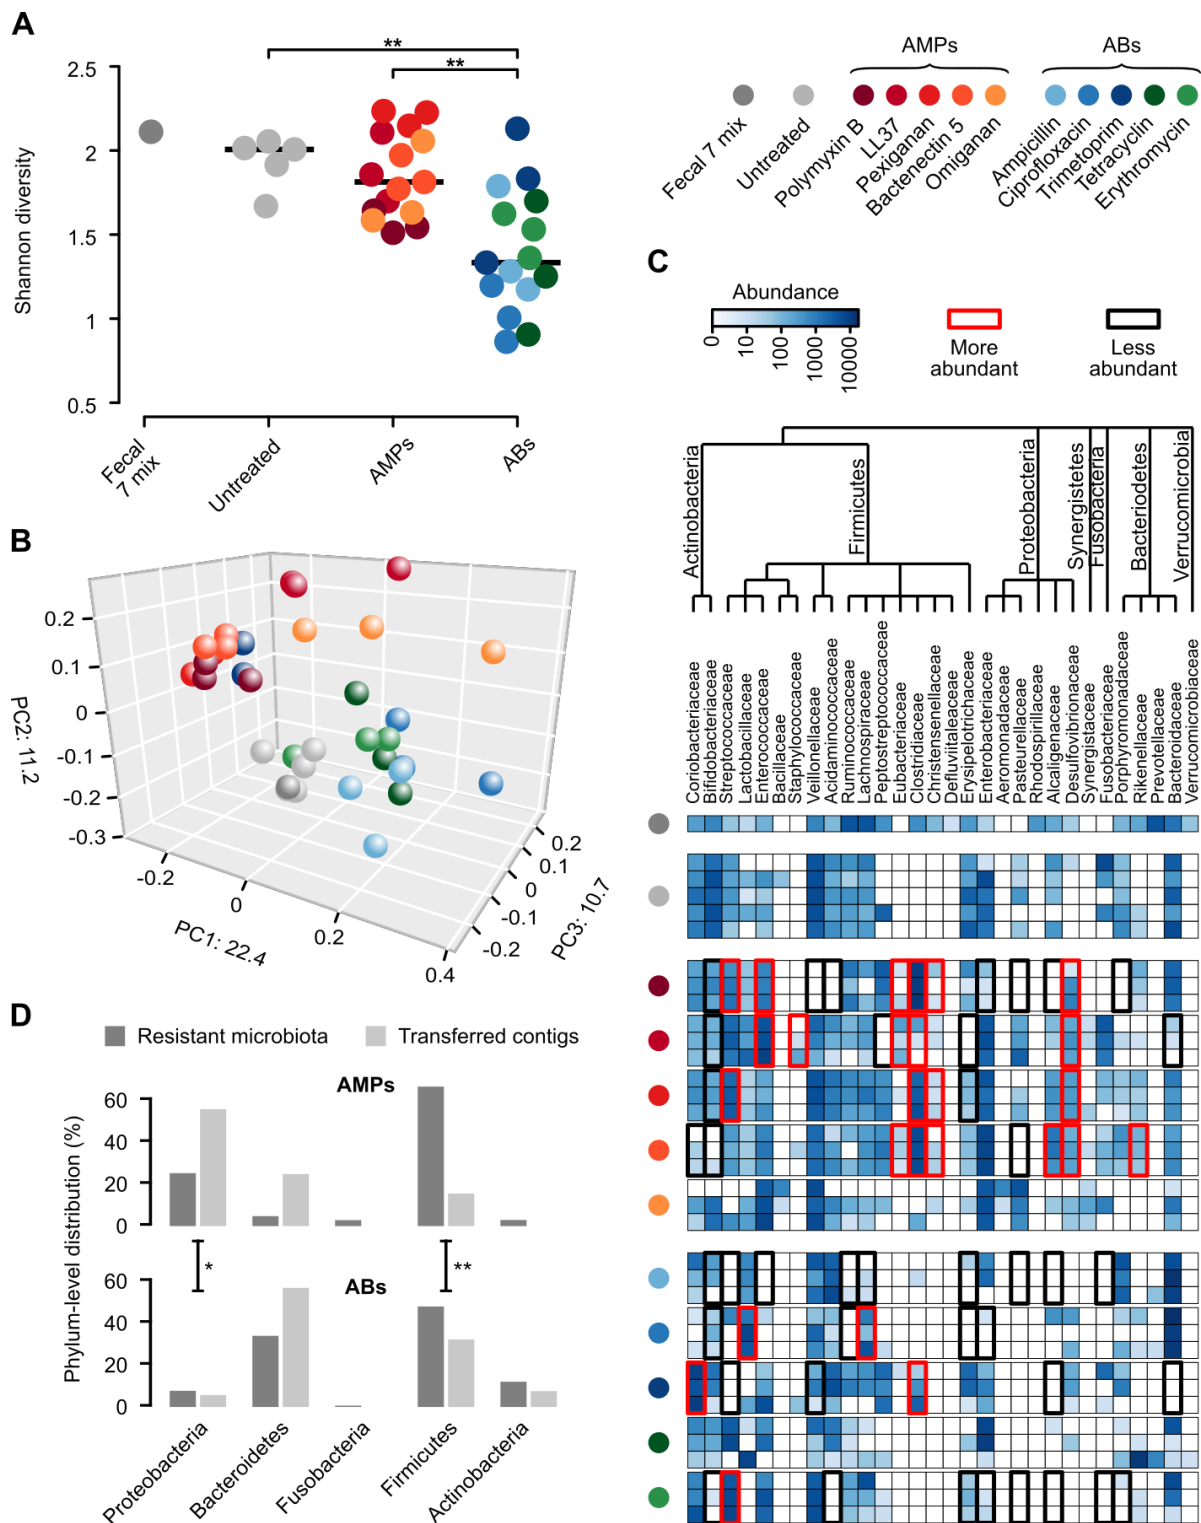

431 **Figure 3. Culturing reveals a diverse AMP-resistant gut microbiota with limited potential to**  
 432 **transfer resistance to *E. coli* A** Diversities of the cultured microbiota and the original faecal  
 433 sample (Fecal 7 mix). Data represents Shannon alpha diversity indexes at family level based on  
 434 16S rRNA profiling of V4 region. AMP/antibiotic treatments are colour-coded. Untreated samples  
 435 were grown in the absence of any AMP or antibiotics. \*\* indicate a significant difference,  $P < 0.01$   
 436 from two-sided Mann-Whitney U test,  $n = 36$ . Central horizontal bars represent median values. **B**) A  
 437 PCoA (principal coordinate analysis) plot based on unweighted UniFrac distances<sup>33</sup> separates the  
 438 AMP- and antibiotic-resistant, and the untreated microbial communities ( $P = 0.001$ , PERMANOVA  
 439 test,  $n = 36$ ). **C**) Differential abundance analyses between the untreated and the AMP/antibiotic-  
 440 resistant microbiota at the family level (see Methods). Brackets depict a significant increase (red)  
 441 or decrease (black) in abundance of a given family as a consequence of AMP or antibiotic  
 442 treatment. **D**) Phylum-level distributions of resistant gut bacteria and resistance DNA contigs

443 originating from them. Compared to their relative frequencies in the drug-treated cultured  
444 microbiota, the phylogenetically close Proteobacteria contributed disproportionately more AMP than  
445 AB resistance contigs, whereas the opposite pattern was seen for the distantly related Firmicutes.  
446 Asterisks indicate significant interaction terms in logistic regression models,  $P < 0.05$  (\*) and  $P < 0.01$   
447 (\*\*), respectively (for more details see Methods).

448

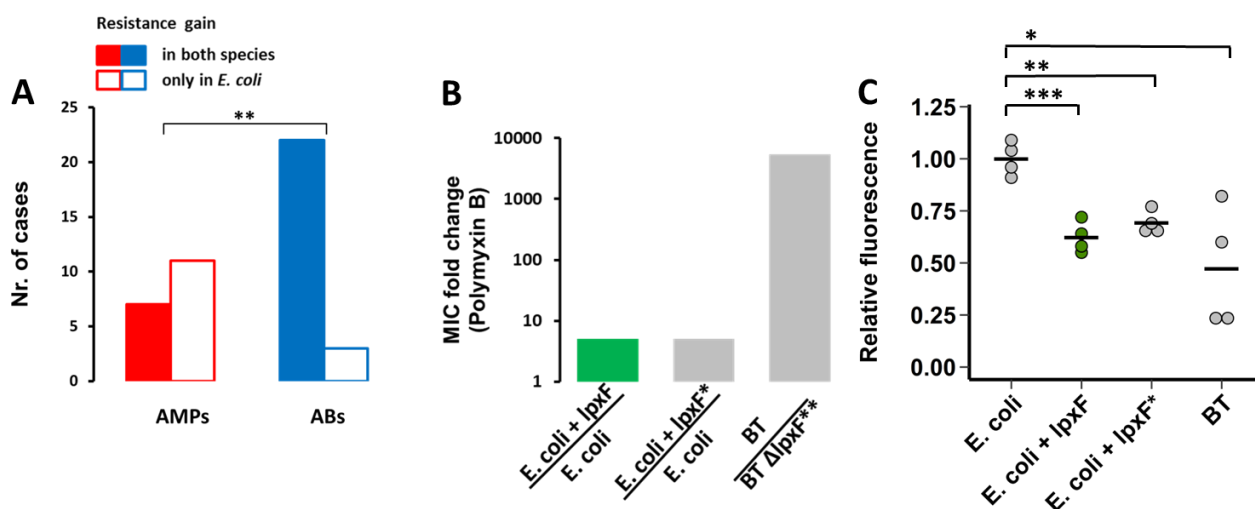

449

450 **Figure 4. AMP resistance DNA fragments provide host-dependent phenotypic effects.** **A)** A  
451 significantly lower proportion of AMP resistance DNA fragments conferred resistance in both *E. coli*  
452 and *S. enterica* compared to antibiotic resistance DNA fragments, suggesting weaker between-  
453 species conservation of the AMP resistance phenotypes. Asterisks indicate significant difference,  
454  $P=0.0011$ , two-sided Fisher's exact test,  $n=16$  for AMPs,  $n=25$  for ABs. **B)** The *lpxF* ortholog from  
455 *Parabacteroides merdae* (marked as *lpxF*) isolated in our screen (Table 1) increases Polymyxin B  
456 resistance of *E. coli* only five-fold (green bar), to the same extent as a previously characterized  
457 fully functional *LpxF* from *Francisella tularensis* (marked as *lpxF*\*). In contrast, *lpxF* in its original  
458 host, *B. thetaiotaomicron* (denoted as *lpxF*\*\*\*) provides a 5000-fold increment in polymyxin B  
459 resistance. **C)** The *lpxF* and *lpxF*\* decrease the net negative surface charge of *E. coli* (green bar)  
460 to the same extent, to the level of wild-type *Bacteroides thetaiotaomicron* (BT) expressing its native  
461 *LpxF*\*\*\*. The fluorescence signal is proportional to the binding of the FITC-labeled poly-L-lysine  
462 polycationic molecule. Less poly-L-lysine binding reflects a less negative net cell surface charge. \*,  
463 \*\*, \*\*\* indicate significant differences ( $P= 0.03, 0.001$  and  $0.0004$ , respectively, Welch Two-Sample  
464 t-test,  $n=4$  biological replicates, central horizontal bars represent mean values). Corresponding  
465 microscopic pictures are shown in Figure S9.  
466



467 **Table 1.** List of putative AMP resistance genes identified from our functional metagenomic  
 468 screens. These resistance genes could be functionally annotated based on a literature-curated  
 469 catalogue of resistance genes (Table S1).

470

| Resistance gene      | Resistance gene function                            | Classification of resistance function | Estimated source organism            | UniProt ID                 | AMP                            |
|----------------------|-----------------------------------------------------|---------------------------------------|--------------------------------------|----------------------------|--------------------------------|
| <i>lpxF</i>          | Lipid A 4'-phosphatase                              | Target alteration                     | Parabacteroides sp.                  | P94571                     | Polymyxin B, Pexiganan         |
| <i>lpxF</i>          | Lipid A 4'-phosphatase                              |                                       | NA                                   | P75806                     | Polymyxin B                    |
| <i>lpxF</i>          | Lipid A 4'-phosphatase                              |                                       | Parabacteroides merdae ATCC 43184    | NA                         | Polymyxin B, Pexiganan         |
| <i>arnTEF</i>        | 4-amino-4-deoxy-L-arabinose-modification of Lipid-A |                                       | Escherichia coli MS 107-1            | P76473<br>Q47377<br>P76474 | Polymyxin B                    |
| <i>pmrAB (qseBC)</i> | Response regulator                                  | Regulation                            | Sutterella wadsworthensis 2_1_59BFAA | P52076<br>P40719           | Polymyxin B                    |
| <i>pmrD</i>          | Signal transduction protein                         |                                       | Escherichia coli MS 107-1            | P37590                     | Polymyxin B                    |
| <i>ompT</i>          | Protease 7 precursor                                | Agent inactivation                    | Escherichia coli MS 196-1            | P09169                     | Bactenectin 5, LL37, Pexiganan |

471

472 Supplementary Materials for

473

474 **Phylogenetic barriers to horizontal transfer of antimicrobial peptide resistance genes in the**  
475 **human gut microbiota**

476 Bálint Kintses\*, Orsolya Méhi, Eszter Ari, Mónika Számel, Ádám Györkei, Pramod K. Jangir, István  
477 Nagy, Ferenc Pál, Gergő Fekete, Roland Tengölics, Ákos Nyerges, István Likó, Balázs Bálint,  
478 Bálint Márk Vásárhelyi, Misshelle Bustamante<sup>2</sup>, Balázs Papp\* & Csaba Pál\*

479 \*Correspondence to cpal@brc.hu, pappb@brc.hu or kintses.balint@brc.mta.hu

480

481

482 **This PDF file includes:**

483

484 Materials and Methods

485 Figures S1 to S12

486 Tables S3, S6, S7, S9

487 Captions for Tables S1, S2, S4, S5, S8, S10 and S11

488

## 489 **Materials and Methods**

### 490 ***Establishing a comprehensive AMP resistance gene dataset***

491 Even though several databases have been created for antibiotic resistance genes, a  
492 comprehensive list of AMP resistance genes has not been compiled so far. Therefore, we carried  
493 out a systematic literature mining in PubMed NCBI and Google Scholar with the keywords  
494 “antimicrobial peptide” + “resistance”. From the identified publications genes with experimentally  
495 confirmed influence on AMP susceptibility were included in our manually curated AMP resistance  
496 gene dataset (Table S1). Altogether 131 AMP resistance genes were identified. As a next step, the  
497 compiled AMP resistance genes were classified into resistance gene families (orthologous gene  
498 groups or orthogroups) by the *EggNOG-mapper* software (version 0.12.7) with the bacterial  
499 EggNOG 4.5.1 database<sup>34</sup>. Then, AMP resistance genes were classified into broad functional  
500 categories analogous to the classification of antibiotic resistance genes in The Comprehensive  
501 Antibiotic Resistance Database (CARD)<sup>35</sup>. To obtain a comparable dataset for known antibiotic  
502 resistance genes we downloaded the CARD database<sup>35</sup>. Antibiotic resistance genes from CARD  
503 were grouped into resistance gene families in the same way as AMP resistance genes using the  
504 EggNOG 4.5.1 database (Table S1).

505

### 506 ***Analysis of the mobile gene pool of the gut microbiota***

507 A previously published mobile gene catalogue of the human gut microbiota<sup>15</sup> was analyzed to  
508 compare the patterns of horizontal gene transfer events involving AMP and antibiotic resistance  
509 genes across a wide range of bacteria. This mobile gene catalogue relies on the identification of  
510 nearly identical genes in distantly related bacterial genomes and thereby provides a snapshot on  
511 the gene set subjected to recent horizontal gene transfer events in a representative sample of the  
512 gut microbiota. The goal in our analysis was to determine the presence/absence pattern of the  
513 AMP and antibiotic resistance genes not only in the mobile gene pool but also in the 567 genomes  
514 from which the mobile gene pool was derived. In this way, not only the horizontally transferred  
515 resistance genes were identified but also those that have not been detected in such transfer  
516 events, but were present in the gut microbiome. To this end, the genomes and proteomes used by  
517 Brito et al.<sup>15</sup> were downloaded from the Human Microbiome Project (HMP) database  
518 (<https://www.hmpdacc.org/HMRGD/>) and from Fijicomp website (<http://www.fijicomp.org>). DNA  
519 sequences derived from the latter database were used for ORF prediction with *Prodigal* software  
520 (version 2.6.3,<sup>36</sup>). Then, a sequence similarity search was applied on the compiled list of proteins  
521 encoded in the analyzed genomes to identify those that were present in the mobile gene pool as  
522 well. The sequence similarity search between the mobile gene pool and the proteins from the  
523 genomes was carried out with the *blastx* option of the *Diamond* software (version 0.9.10,<sup>37</sup>) with  
524 50% sequence coverage and 100% sequence identity (parameters were chosen to reproduce the  
525 original publication of the mobile gene pool<sup>15</sup>). Out of the 37,870 unique mobile genes in the mobile  
526 gene pool, we identified 37,184 in the genomes (98.28%).

527 Next, both the antibiotic- and AMP-resistance genes were identified among the mobile  
528 genes and among those that have not been detected in the mobile gene pool but were present in  
529 the genomes. For this functional annotation, a blast search was carried out against the antibiotic  
530 resistance genes from the CARD database<sup>35</sup> with the *blastp* option of the *Diamond* software<sup>37</sup> with  
531 strict parameters ( $e$ -value  $< 10^{-5}$ ,  $> 40\%$  identity at the protein level and 80% query sequence  
532 coverage) (Table S1). In a similar vein, AMP resistance genes were identified by performing *blastp*  
533 sequence similarity search against the manually curated list of AMP resistance genes (Table S1).  
534 This AMP resistance gene list was compiled by literature mining in PubMed NCBI and Google  
535 Scholar with the keywords “antimicrobial peptide” + “resistance”. From these publications genes  
536 with experimentally confirmed influence on AMP susceptibility were included in our AMP resistance  
537 gene database (Table S1). Antibiotic and AMP resistance genes in our databases were classified  
538 into resistance gene families by the *EggNOG-mapper* software (version 0.12.7) on the bacterial  
539 EggNOG 4.5.1 database<sup>34</sup> (Table S1). For the annotated resistance gene list in the mobile gene  
540 pool, see Table S2.

541 To compare the relative frequency of the AMP- and antibiotic-resistance genes in the  
542 mobile gene pool (Figure 1A), we restricted the analysis to one genome per species. This was  
543 necessary to avoid sampling bias since different species were represented by unequal numbers of  
544 genomes in the dataset. To this aim, 16S rRNA sequences were determined for each genome (for  
545 HMP genomes they were downloaded from the Silva database<sup>38</sup>, while for Fiji genomes they were  
546 identified directly in the genomes using the *RNAmmer* software (version 1.2<sup>39</sup>). Then, genomes  
547 with lower than 2% 16S RNA gene dissimilarities were collapsed into genome groups (‘species’ or  
548 OTUs) using average linkage clustering as it is described in the publication of the mobile gene  
549 pool<sup>15</sup>. Then, from each genome group, the genome with the largest number of annotated  
550 resistance genes was selected for further analyses. Resistance genes in the mobile gene pool that  
551 resulted in a blast hit both from the AMP- and the antibiotic-resistance databases were excluded  
552 from the analysis. The remaining annotated resistance genes were counted and plotted in Figure  
553 1A.

554 For each unique mobile AMP- or antibiotic-resistance gene we estimated the minimum  
555 number of independent transfer events (Figure 1B) by counting the number of genome groups (i.e.  
556 OTUs) in which the gene is present in the mobile gene pool<sup>15</sup>.

557

### 558 **Construction of gut metagenomic libraries**

559 To sample the gut resistome, we applied a previously established small-insert shotgun  
560 metagenomic protocol<sup>11</sup> with small modifications. This method identifies small genomic fragments  
561 that decrease drug susceptibility via plasmid-mediated gene transfer. For the construction of the  
562 metagenomic libraries, human stool samples were obtained from two healthy unrelated individuals,  
563 who have not taken any antibiotics for at least one year prior to sample donation. Samples were  
564 handled with the observation of ethical rules. Gut community DNA was isolated immediately after

565 sample donation, using ZR Fecal DNA MiniPrep™ kit (Zymo Research) according to the  
566 manufacturer's instructions (<http://www.zymoresearch.com/downloads/dl/file/id/91/d6010i.pdf>).  
567 Subsequently, 10 µg of metagenomic DNA from each sample was partially digested with 0.25 U  
568 MluCI restriction enzyme (New England BioLabs) in 10x CutSmart Buffer (New England BioLabs)  
569 at 37°C for 20 minutes, followed by heat inactivation at 85°C for 20 min. MluCI is a four-base cutter  
570 restriction enzyme that produces overhangs complementary to the ones that EcoRI produces. By  
571 varying incubation time or the enzyme concentration, the size range of the resulting DNA  
572 fragments can be set. The fragmented DNA was size selected by electrophoresis on a 1 % (m/V)  
573 agarose gel in 1X Tris-Acetate-EDTA (TAE) buffer. A gel slice corresponding to 1500-5000 bp was  
574 excised from the gel and DNA was isolated using a GeneJET Gel Extraction and DNA Cleanup  
575 Micro Kit (Thermo Scientific). 5 µg of pZErO-2 plasmid DNA (Thermofisher,  
576 [https://tools.thermofisher.com/content/sfs/vectors/pzero2\\_map.pdf](https://tools.thermofisher.com/content/sfs/vectors/pzero2_map.pdf)) was digested with 25 U EcoRI  
577 restriction enzyme (Fermentas) in 10x EcoRI Buffer (Fermentas) for 2 hrs, followed by 20 minutes  
578 heat inactivation at 65°C. After purification with DNA Clean & Concentrator™-5 kit (Zymo  
579 Research), digested pZErO-2 plasmid was dephosphorylated with FastAP alkaline phosphatase  
580 (Thermo Scientific) as follows: 4 µg plasmid DNA was incubated with 4U enzyme in 10x  
581 FastDigest buffer at 37°C for 1 hr, followed by 5 minutes heat inactivation at 74°C and purification  
582 with DNA Clean & Concentrator™-5 kit (Zymo Research). DNA was ligated into pZErO-2 at the  
583 EcoRI site using the Rapid DNA ligation kit (Thermo Scientific). The ligation reaction was  
584 performed in 15 µl total volume using a 5:1 insert-vector ratio: 4.5 µl (310 ng) digested and gel  
585 purified DNA insert, 0.65 µl (62 ng) EcoRI-cut pZErO-2 vector, 3 µL 5X ligation buffer, 0.75 µL 10  
586 mM ATP, 4.1 µL dH<sub>2</sub>O, 2 µL T4 DNA Ligase (5 U/µl). The ligation mixture was incubated at 16°C  
587 overnight, followed by heat inactivation at 65°C for 10 minutes.

588 Prior transformation, the ligation mixture was purified with DNA Clean & Concentrator™-5  
589 kit (Zymo Research). 3.5 µL of the resulting ligation mixture was transformed by electroporation  
590 into 50 µL of electrocompetent *E. coli* DH10B™ cells (Invitrogen). Electroporation was carried out  
591 with a standard protocol for a 1 mm electroporation cuvette. Cells were recovered in 1 mL SOC  
592 medium, followed by 1-hour incubation at 37°C. 500 µL of the recovered cells was plated onto  
593 square Petri dishes containing Luria Bertani (LB) agar supplemented with 50 µg/mL kanamycin. In  
594 order to assess the library size (number of colony forming units (CFU)), 1 µL of the electroporated  
595 cells was saved for plating onto a separate Petri dish containing Luria Bertani (LB) agar  
596 supplemented with 50 µg/mL kanamycin. From each plate, 10 clones were randomly picked for  
597 colony PCR in order to confirm the presence and the size distribution of the inserts. PCR was  
598 performed using the Sp6-T7 primer-pair (Table S11) flanking the EcoRI site of the multiple cloning  
599 site of the pZErO-2 vector. The sizes of the PCR products were determined by gel electrophoresis  
600 and the average insert size was calculated as 2-3 kb. The size of each library was determined by  
601 multiplying the average insert size by the number of total colony forming units (CFU). The size  
602 distributions of the libraries varied between 4.4 – 16 Gb coverage with this protocol, which is in line

603 with a previously published state-of-the-art protocol<sup>11,19</sup>. The resulting colonies from the Petri  
604 dishes were collected and the plasmid library was isolated using InnuPREP Plasmid Mini Kit  
605 (Analytic Jena). 30-60 ng of isolated plasmid library was transformed by electroporation into 40  $\mu$ L  
606 electrocompetent *E. coli* BW25113 (prepared as described in<sup>40</sup>). This *E. coli* strain was used for  
607 the functional selections (see below). After electroporation, cells were recovered in 1 mL of LB  
608 medium for 1 hour at 37°C. Special care was taken to achieve high electroporation efficiency in  
609 order to cover 10-100 times the original library size. In this way, we ensured that most library  
610 members are electroporated from the plasmid library. The 1 mL recovered cell culture was added  
611 to 9 ml of LB medium supplemented with 50  $\mu$ g/mL kanamycin, and grown at 37 °C for 2-3 hours  
612 until it reached the 7.5-10 x 10<sup>8</sup> cell density (OD<sub>600</sub>: 1.5-2). Cell aliquots were frozen in 20%  
613 glycerol and kept at -80°C for subsequent functional selection experiments.

614 Metagenomic libraries were generated from the uncultured microbiota (i.e. the total DNA  
615 extracted from the stool samples) and from the cultured microbiota (i.e. the genomic DNA  
616 extracted from the cultured pooled microbiota), too. For details see the section "*Cultivation of the*  
617 *gut microbiota under anaerobic conditions and DNA extraction*".

618

### 619 **Functional metagenomic selections for AMP/AB resistance**

620 Functional selections for resistance were carried out on solid plates containing one of the 12  
621 antimicrobial peptides (AMPs) or 11 antibiotics (ABs) (Table S3). Instead of the plating assay that  
622 is commonly used in the field<sup>11</sup>, we applied a modified gradient plate assay<sup>41</sup>, where bacteria are  
623 exposed to a concentration gradient of the antimicrobial instead of a single concentration. We  
624 found that this strategy improves reproducibility of AMP selections, where changes in the  
625 resistance levels are relatively small compared to that in the case of ABs. The growth medium in  
626 these plates was a modified minimal salt medium (MS) with reduced salt concentration (1 g  
627 (NH<sub>4</sub>)<sub>2</sub>SO<sub>4</sub>, 3 g KH<sub>2</sub>PO<sub>4</sub>, 7 g K<sub>2</sub>HPO<sub>4</sub>, 100  $\mu$ L MgSO<sub>4</sub> (1 M), 540  $\mu$ L FeCl<sub>3</sub> (1 mg/ml), 20  $\mu$ L thiamine  
628 (50 mg/ml), 20 ml casamino acids (BD) (10 % (m/V)), 5 ml glucose (40 % (m/V)) in a final volume  
629 of 1 L), since most AMPs are not effective *in vitro* in the presence of high salt concentrations. In  
630 the case of the AMP containing plates, the solidifying agent was changed to 1.5 % (m/V) of low  
631 melting point agarose (UltraPure™ LMP Agarose (Invitrogen)) from 1.5 % (m/V) agar, in order to  
632 prevent any heat-induced structural damage of the peptides during plate pouring. ABs and AMPs  
633 were purchased from Sigma and ProteoGenix, respectively. Onto each of the gradient plates (Tray  
634 plates, SPL Life Sciences) 2x10<sup>8</sup> cells were plated out from the thawed stocks of *E. coli* BW25113  
635 bearing the metagenomic plasmid libraries. In this way, each metagenomic library member was  
636 represented about 10-100 times on each plate. We found this necessary for a good reproducibility  
637 for our experiments. Subsequently, plates were incubated at 30°C for 24 hours. For each  
638 functional selection, a control plate was prepared where the same number of *E. coli* BW25113 was  
639 plated out. These cells contained the pZErO-2 plasmid with a random metagenomic DNA insert  
640 that has no effect on AMP/AB resistance. This control plate showed the minimum inhibitory



641 concentration (MIC) of the antimicrobial without the effect of a resistance plasmid. The empty  
642 plasmid was not applicable as a control because in the absence of a DNA insert the CcdB toxic  
643 protein is expressed from the plasmid. In order to isolate the resistant clones from the library  
644 plates, sporadic colonies were identified above the MIC level (defined using the control plate) by  
645 visual inspection. These clones were collected by scraping them into 2 ml of LB broth and stored  
646 subsequently at -80°C.

647

#### 648 ***Validation of the resistance-conferring metagenomic DNA fragments***

649 Following selection of the metagenomic libraries, the putative resistance phenotypes conferred by  
650 the plasmid selections were confirmed for a representative fraction of the colonies. From each  
651 selection at least 20 colonies were picked and the MIC increase was determined by a standard  
652 broth microdilution method<sup>42</sup>, as it is described in the section “*Quantification of the resistance gains  
653 that metagenomic contigs provide*”. For these measurements, the same control plasmid was used  
654 as in the functional selections. MIC values were determined after 16-24 hours of incubation at  
655 30°C with a continuous shaking at 240 rpm. Plasmids from validated resistant clones were  
656 retransformed into the BW25113 *E. coli* strain, followed by a second MIC determination in order to  
657 exclude the possibility that the increase in the MIC was induced by genomic mutations. Plasmids  
658 not showing MIC increase in the validation protocol were excluded from further analysis. Mostly the  
659 clones situated closer than 1 cm to the MIC level on the gradient plates did not confer resistance  
660 during validation. To avoid these false positive resistance plasmids, colonies at the borderline were  
661 not collected for further analysis without confirming their phenotype. The rest of the colonies were  
662 collected by scraping them into 2 ml of LB broth. Bacterial samples then were stored at -80 °C in  
663 20 % (m/V) glycerol. When only a few clones were on the plates, all were tested for resistance to  
664 make sure that we do not lose potential hits. We encountered such situations only in the case of  
665 AMPs. If the number of resistant clones on a plate was less than or equal to 20, plasmids were  
666 isolated individually from the MIC validated clones and sent for Sanger bidirectional sequencing  
667 with the Sp6-T7 primer pair (Table S11). When the resistance-conferring insert was longer than  
668 what the initial sequencing covered, we applied a primer walking strategy to sequence the middle  
669 part of the insert.

670

#### 671 ***Amplification of the resistance-conferring metagenomic DNA fragments***

672 Plasmid pools from the scraped resistant clones were PCR amplified for subsequent PacBio  
673 sequencing<sup>43</sup>. To this aim, first, the plasmid pools were isolated from each metagenomic selection  
674 using InnuPREP Plasmid Mini Kit (Analytic Jena). Then, these plasmid pools served as templates  
675 for subsequent PCR amplification reactions to amplify the inserts from the pooled plasmids. These  
676 PCR reactions were performed with barcoded Sp6 and T7 specific primers as forward and reverse  
677 primers, respectively. The 16-base long PacBio barcode dual-end labelling scheme was used to  
678 label each plasmid pool for sample identification in the subsequent PacBio sequencing. Primer



679 sequences are shown in Table S11. PCR reactions consisted of 30 ng of template DNA, Q5 Hot  
680 Start High-Fidelity 2x Master Mix (New England BioLabs), 0.2  $\mu$ M barcoded primers in a final  
681 reaction volume of 25  $\mu$ l. Following an optimization process, the number of PCR cycles was  
682 reduced to 15 in order to minimize amplification bias. The following thermocycler conditions were  
683 used: 98°C for 5 minutes, 15 cycles of 98°C for 15 seconds + 69°C for 30 seconds + 72°C for  
684 2 minutes, and 72°C for 7 minutes. The amplified metagenomic inserts were then cleaned using  
685 the DNA Clean & Concentrator™-5 kit (Zymo Research) and their concentration was measured  
686 with Qubit fluorometer (Invitrogen). In order to get rid of the short amplicons (e.g. primer dimers),  
687 which may interfere with the sequencing process, barcoded amplicons were mixed at an equimolar  
688 ratio and the sample was gel extracted following electrophoreses using 1% agarose gel. The  
689 sample was purified (Zymoclean™ Gel DNA Recovery Kit) prior sequencing.

690

### 691 ***Pacbio sequencing and data analysis***

692 Sequences of the pooled PCR products were obtained from the Norwegian Sequencing Centre at  
693 the University of Oslo, Norway. The library was prepared using Pacific Biosciences Amplicon  
694 library preparation protocol. Samples were sequenced with Pacific Biosciences RS II instrument  
695 using P6-C4 chemistry and MagBead loading in one SMRT cell. 61,641 reads were obtained with  
696 a mean length of 20,961 bp. Reads were filtered without demultiplexing using *RS\_subreads.1*  
697 pipeline on *SMRT Portal* (version 2.3.0) using default settings (number of passes 1, minimum  
698 accuracy 0.9). Following barcode detection and demultiplexing, reads were collapsed to  
699 consensus sequences using the long amplicon analysis pipeline of the *SMRT Portal* with default  
700 settings. We validated our sequencing effort on a mock sample containing 9 previously sequenced  
701 DNA contigs that originate from our metagenomic selections. Reassuringly, out of the 9 sequences  
702 8 were present in the Pacbio sequencing result with at least 99% sequence identity. The single  
703 non-detected contig was the longest one (4500 bp) which may indicate a bias of the pipeline  
704 toward shorter insert sizes.

705

### 706 ***Functional annotation and resistance gene identification on the metagenomic contigs***

707 To functionally analyze the ORFs on the assembled contigs from the metagenomic selections,  
708 ORFs were predicted and annotated using the *Prokka* suite (version 1.11, <sup>44</sup>) with the bacterial  
709 prediction settings and an *e*-value threshold of  $10^{-5}$ . Within *Prokka*, *Prodigal* (version 2.6.3, <sup>36</sup>)  
710 subscript was modified to run without *-c* parameter to identify highly probable ORFs, even if the  
711 ends were not closed. This was necessary because some contigs may have been shortened by a  
712 few residues during the cloning process or in the assembly due to low coverage, without losing  
713 their functionality. Other parameters were kept as default. Next, ORFs on the metagenomic contigs  
714 were functionally annotated with our resistance gene lists introduced in the section “*Analysis of the*  
715 *mobile gene pool of the gut microbiota*”. Specifically, an ORF was classified as an antibiotic  
716 resistance gene when sequence similarity search using *blastp*<sup>45</sup> against The Comprehensive

717 Antibiotic Resistance Database (CARD)<sup>35</sup>, resulted in an annotation with an e-value  $< 10^{-5}$ , identity  
718  $> 30\%$  and coverage  $> 80\%$ . Here, the minimum sequence identity was lower than in the case of  
719 the analysis of the mobile gene pool, since the experimentally observed resistance phenotype  
720 provided an extra confidence for the annotation. Similarly, AMP resistance genes were identified  
721 by performing *blastp* sequence similarity search against the manually curated list of AMP  
722 resistance genes (Table S1).

723 To estimate the identity of the donor organisms from which the assembled DNA contig  
724 sequences originated from, a nucleotide sequence similarity search was carried out for the entire  
725 DNA contigs as query sequences against the genome sequences from the Human Microbiome  
726 Project<sup>25</sup> using *blastn*, with an e-value threshold of  $< 10^{-10}$ . Taxonomy was assigned with the *ete3*  
727 toolkit<sup>34</sup>.

728

### 729 ***Cultivation of the gut microbiota under anaerobic conditions and DNA extraction***

730 In order to compare the abundance and phylogenetic distribution of the AMP and AB resistant gut  
731 bacteria, we applied a recently established anaerobic cultivation protocol of the human gut  
732 microbiota with small modifications<sup>26</sup>. For this purpose, human faecal samples were obtained from  
733 seven healthy unrelated volunteers, who had not taken any antibiotics for at least one year prior to  
734 sample donation. Ethical rules were observed throughout the whole study. Following defecation,  
735 stool samples were immediately placed into uncapped 50 ml plastic tubes (Sarstedt), deposited in  
736 anaerobic bags (Oxoid, Thermo Scientific) and samples were transferred into the anaerobic  
737 chamber within 1 hour after sample collection. All anaerobic experiments were performed in a  
738 Bactron IV anaerobic chamber (Shel Lab) filled with an atmosphere of 95% nitrogen and 5%  
739 hydrogen, with palladium catalysts. Two grams of the faecal samples were suspended in 20 ml of  
740 modified Gifu Anaerobic Medium (GAM) Broth (HyServe). After 10 minutes of incubation, letting  
741 the solid particles settle down, the supernatants were supplemented with 20% glycerol, aliquoted  
742 and stored at  $-80^{\circ}\text{C}$ . Prior to the cultivation of the microbiota, thawed aliquots from the samples of  
743 the 7 individuals were combined in an equal ratio (we refer to this sample mix as “Fecal 7 mix”  
744 sample) in the anaerobic chamber. Then this Fecal 7 mix sample was plated out anaerobically in  
745 the presence and absence of one of the five AMPs or one of the five ABs that were active in the  
746 culturing medium (Table S3). The culturing medium was modified Gifu Anaerobic Medium (GAM),  
747 considering that the best reconstruction of the composition and architecture of the human gut  
748 bacterial community could be obtained using this medium<sup>26</sup>. In the case of AMP containing plates,  
749 the solidifying agent was low melting agarose instead of agar for the same reason as before (see  
750 section “*Functional metagenomic selections for AMP/AB resistance*”). Each AMP/AB was applied  
751 in three different concentrations on separate plates in three replicates. Plates were incubated at  
752  $37^{\circ}\text{C}$  in the anaerobic chamber for a 4-day time interval, since following the 4<sup>th</sup> day we observed a  
753 plateau in the number of appearing colonies. Following colony counts the plates had to fulfil two  
754 requirements to be selected for subsequent analysis. First, colony numbers needed to be in the

755 range of 0.01-0.1% as compared to the colony numbers in the absence of any AMP/AB treatment  
756 (we refer to these samples as Untreated). Second, colony numbers needed to be high, but still in  
757 the countable range (1000-5000 colonies). To be in this range in the case of the untreated  
758 samples as well the Fecal 7 mix sample was plated out in a concentration that is 1000-fold more  
759 dilute as what was applied in the case of AMP/AB selections. For Trimetoprim the selection  
760 pressure could not be increased that much to select for the most resistant 0.01-0.1% of the  
761 population since 0.49 % of the colonies were able to grow even at the solubility limit of this  
762 antibiotic. From the selected plates resistant colonies were scraped and the pooled colonies from  
763 each plate were used to isolate genomic DNA with ZR Fecal DNA MiniPrep™ kit (Zymo Research)  
764 according to the manufacturer's instructions  
765 (<http://www.zymoresearch.com/downloads/dl/file/id/91/d6010i.pdf>). The isolated DNA samples  
766 were subsequently used for both small-insert shotgun library constructions (referred to them as  
767 libraries from cultured microbiota, Table S7) and for 16S rRNA based community profiling. To  
768 estimate the relative resistance level of the gut microbiota compared to *E. coli* BW25113, we used  
769 the colony counts from the anaerobic cultivation experiments at each AMP/AB concentration, i.e.  
770 the resistance level of the gut microbiota against an AMP/AB is defined as the AMP/AB  
771 concentration at which only 0.1-0.01% of the untreated microbiota population could grow (see  
772 details above), analogously to an MIC value determination for a single species. The susceptibility  
773 of *E. coli* was estimated in the same way as for the gut microbiota by plating out anaerobically the  
774 same number of cells as in the case of the Fecal 7 mix sample for each AMP/AB treatment. Then  
775 we determined the AMP/AB concentrations at which only 0.1-0.01% of the *E. coli* cells could grow.  
776 The relative resistance level of the gut microbiota was defined as the resistance level of the gut  
777 microbiota divided by the resistance level of *E. coli* (Table S6).

778

### 779 **16S rRNA-based bacterial community profiling**

780 To determine the taxonomic composition of the AMP/AB resistant gut bacterial communities, we  
781 sequenced and analyzed the V4 region of the 16S rRNA genes from the Fecal 7 mix samples  
782 cultivated in the presence of individual AMPs and ABs. We also determined the phylogenetic  
783 composition of the uncultivated Fecal 7 mix sample. The V4 region of the 16S rRNA gene was  
784 PCR amplified with dual-indexed Illumina primer-pairs, using different combinations of barcoded  
785 forward and reverse primers (v4.SA501-505 and v4.SA701-706, respectively, Table S11) as  
786 previously described<sup>46</sup>. The primers consist of the appropriate Illumina adapters, an 8-nt index  
787 sequence, a 10-nt pad sequence, a 2-nt linker and specific sites for the V4 region. The PCR  
788 reactions consisted of 1.5 µl (30 ng) of template DNA, 10 µl of Phusion HF buffer (Thermo Fisher  
789 Scientific), 4 µl of 2.5 mM deoxynucleotide triphosphates mix (dNTPs), 0.5 µl of Phusion DNA  
790 polymerase (2 U/µl) (Thermo Fisher Scientific), 1-1 µl of primers, 10 µM each, 3 µl DMSO (100%)  
791 and 29 µl of nuclease-free H<sub>2</sub>O in a final reaction volume of 50 µl. The following thermocycler  
792 conditions were used: 95 °C for 2 minutes, 25 cycles of 95 °C for 20 seconds + 56 °C for 15

793 seconds + 72 °C for 5 minutes, and 72 °C for 10 minutes. Following gel electrophoreses of the PCR  
794 products, the 400 bp long amplicons were extracted from the gel (Thermo Scientific GeneJET Gel  
795 Extraction Kit) and, following a second purification step (Zymo Research DNA Clean &  
796 Concentrator™-5 Kit), were sequenced using MiSeq Illumina platform. To prepare the samples for  
797 sequencing, the amplicons were quantified using a fluorometric method (Qubit dsDNA BR Assay  
798 Kit, Thermo Fischer Scientific) and libraries were mixed with Illumina PhiX in a ratio of 0.95 to 0.05.  
799 Sequencing on the Illumina MiSeq instrument was carried out with a v2 500 cycle sequencing kit  
800 (Illumina). 100 µM stock custom sequencing primers<sup>46</sup> were mixed with standard read1, index read  
801 and read2 sequencing primers included in the MiSeq cartridge.

802 After sequencing, 16S rRNA reads were demultiplexed and processed with the *Mothur*  
803 software (version 1.36.1,<sup>47</sup>). The average counts per sample were 21,979. To filter out the low-  
804 read-counts we followed the protocol of Rettedal et al.<sup>26</sup>. The number of sequences per sample  
805 was equalized to 20,000 read counts using random re-sampling with a custom *R* script.  
806 Reassuringly, 20,000 read counts are well above the threshold where phylogenetic diversities  
807 show saturation in the samples (see the rarefaction curves of samples in Figure S11, that were  
808 calculated using the *vegan* (version 2.4-3,<sup>48</sup>) *R* package). Sequences were merged at the level of  
809 97% sequence identity and taxonomically assigned using the Silva ribosomal RNA database<sup>38</sup>.  
810 OTUs were classified at the family level since the V4 region allows accurate identification only  
811 down to this level<sup>49</sup> (Table S5). After removal of reads that could not be classified, 362 OTUs  
812 remained. To evaluate the reproducibility of the cultivation and sequencing, we generated seven  
813 replicates from the untreated samples. Samples referred to as “Untreated 1-5” originate from  
814 independent cultivation experiments started from different aliquots of the same five frozen samples  
815 (Figure S5, Figure S12). In the case of “Untreated 5, 5i and 5ii” samples cultivations were started  
816 from the same sample and cultures were grown in parallel (Figure S5, Figure S12).

817 To quantify within-sample diversity from 16S rRNA data, we used the *vegan* (version 2.4-3,  
818 *R* package<sup>48</sup>) to calculate the most commonly used alpha diversity indices (Shannon index: see  
819 Figure 3A; Fisher’s and Inverse Simpson indices: see Figure S6). Unweighted Unifrac distances  
820 (Figure 3B) were computed by the *Phyloseq* (version 1.22.3 *R* package<sup>50</sup>).

821 To identify differentially abundant bacterial families in the resistance microbiota, we applied  
822 the *edgeR* (version 3.16.5 *R* package<sup>51</sup>) on the family-level 16S rRNA abundance data of the  
823 cultured microbiota samples as suggested earlier<sup>52</sup>. To this end, abundances were normalized  
824 using the TMM method<sup>53</sup> and then untreated and AMP/AB treated samples were compared using  
825 negative binomial tests in a pairwise manner. We used the Benjamini-Hochberg FDR correction  
826 method to correct the *p*-values for multiple testing<sup>54</sup>.

827

828

829 ***Comparing the prevalence of AMP- and antibiotic-resistance genes in gut microbial***  
830 ***genomes***

831 In order to assess if the large taxonomic diversity in the AMP resistant microbiota  
832 corresponds to a diverse reservoir of AMP resistance genes, we compared the prevalence of  
833 previously described AMP- and antibiotic-resistance gene families in a representative set of gut  
834 microbial genomes as follows. Genome sequences used for the analysis of the mobile gene pool  
835 (Table S2) were filtered to retain only those sequences that belong to one of the AMP- and  
836 antibiotic-resistant bacterial families (Table S5). In this analysis, we used only the genome  
837 sequences from the Human Microbiome Project (HMP) since in the Fiji cohort the family-level  
838 taxonomic assignments of the genome sequences were sporadic. In the remaining dataset 24  
839 AMP- and 26 antibiotic-resistant bacterial families were represented with 222 and 219 genome  
840 sequences, respectively. To avoid sampling bias due to unequal representation of species among  
841 the genome sequences, one genome sequence was randomly picked from each genome group  
842 (genomes with lower than 2% 16S rRNA gene dissimilarities, for details, see section *Analysis of*  
843 *the mobile gene pool of the gut microbiota*). Then, for each known AMP and antibiotic resistance  
844 gene family, the number of genomes with at least one positive annotation was counted and plotted  
845 (Figure S7).

846

847 ***Comparing phylum-level distributions of the resistant microbiota and the transferring***  
848 ***resistance contigs***

849 To compare the phylum-level distributions of resistant gut bacteria and the resistance contigs  
850 originating from them (Figure 3D), we carried out logistic regression analyses on count data (Table  
851 S9) as follows. For each phylum, we fitted a logistic regression model to predict if a resistant gut  
852 microbiota colony or resistance-conferring contig belongs to that particular phylum or to the rest of  
853 phyla. Thus, each entry in the dataset represented either a colony from the drug-treated cultivation  
854 experiment or a resistance contig detected in the functional metagenomics screen. The predictor  
855 variables of the models were i) whether the entry was a resistance contig or a cultivated colony, ii)  
856 the type of treatment (AMP or antibiotic) and iii) the interaction of these two variables. As we were  
857 interested in whether a given phylum contributed disproportionately more (less) AMP than AB  
858 resistance contigs compared to its relative frequency in the drug-treated cultured microbiota, we  
859 tested if the interaction term of the logistic regression model was significant (using the *glm* function  
860 of *R*).

861



## 862 **Comparison of resistance levels in *E. coli* and *Salmonella enterica***

863 In order to investigate whether the level of resistance provided by AMP resistance genes depends  
864 more on the genetic background of the recipient bacteria than in the case of antibiotic resistance  
865 genes, we measured how DNA fragments that provide AMP or antibiotic resistance to *E. coli*  
866 influence susceptibility in a related Enterobacter species, *S. enterica* Serovar Typhimurium LT2.  
867 For this purpose, we used a representative set of plasmids carrying resistance DNA fragments that  
868 were isolated in our screens from AMP and antibiotic treatments (Table S10). Special care was  
869 taken to avoid the inclusion of multiple plasmids carrying resistance genes with the same function  
870 or bias toward certain AMPs/ABs. To this end, when it was possible, we selected plasmids from  
871 each AMP/AB selection in equal numbers carrying resistance genes with different functions. This  
872 resulted in 16 plasmids and 25 AMPs and ABs. The provided resistance levels (MIC fold changes)  
873 were measured for both species with standard micro-dilution assay the same way as described in  
874 the section below.

875

## 876 **Quantification of the resistance gains that metagenomic contigs provide**

877 To investigate the resistance gains that contigs provide for the recipient bacteria against AMP and  
878 antibiotic treatments, we carried out minimum inhibitory concentration (MIC) measurements with  
879 selected contigs from the uncultured and cultured microbiota. The resistance gains were quantified  
880 by measuring minimum inhibitory concentrations (MIC) with a standard broth microdilution  
881 method<sup>41</sup>. Briefly, 5000 *E. coli* *S. enterica* cells grown overnight in MS medium with 50 µg/ml  
882 kanamycin were used to inoculate wells of a 96-well plate. 3 rows on the plate were inoculated  
883 with the strain in question and 3 rows with control cells. As a control, *E. coli* BW25113 or *S.*  
884 *enterica* Serovar Typhimurium LT2 strains carrying the control plasmid was used as in the  
885 functional metagenomic selection experiments. Prior to inoculation, each well on the plate was pre-  
886 filled with 100 µl modified MS medium supplemented with the proper concentration of AMP or AB.  
887 On the plate each AMP/AB was represented in 11 different concentrations (3 wells /concentration /  
888 clone or control). 3 wells contained only medium to check the growth in the absence of any  
889 antimicrobial. MIC values were determined by measuring OD<sub>600</sub> after 16-24 hours of incubation at  
890 30°C with a continuous shaking at 240 rpm.

891

## 892 **Functional analysis of a putative LpxF from the metagenomic selections**

893 The aim of the functional characterization was twofold. First, to support the functional prediction for  
894 the identified LpxF orthologs with a biochemical assay. Second, to estimate quantitatively the  
895 extent to which these LpxF orthologs reduce the net negative surface charge of the bacterial cell  
896 as compared to a previously characterized LpxF from *Francisella novicida* that removes >90 % of  
897 the 4'-phosphate groups from the pentaacylated lipid A molecules and hence alters the charge of  
898 the outer membrane<sup>55</sup>. To estimate the surface charge of bacterial cells, we used a fluorescein  
899 isothiocyanate (FITC)-labeled poly-L-lysine (PLL) (FITC-PLL) (Sigma-Aldrich®) based assay. Poly-

900 L-lysine is a polycationic molecule, widely applied to study the interaction between charged bilayer  
901 membranes and cationic peptides<sup>56</sup>. The following strains were used in this measurement: *E. coli*  
902 BW25113  $\Delta lpxM$ , *E. coli* BW25113  $\Delta lpxM$  carrying the pZErO-2 plasmid with the LpxF ortholog  
903 from *Parabacteroides merdae* ATCC 43184 identified in our selection experiments (Table 1), *E.*  
904 *coli* BW25113  $\Delta lpxM$  carrying the pWSK29 plasmid with LpxF from *Francisella novicida* (53) and  
905 *Bacteroides thetaiotaomicron*. We measured the phenotypic effect of both LpxF carrying plasmids  
906 on  $\Delta lpxM$  genetic background, since LpxF from *F. novicida* cannot carry out its biological function  
907 in wild-type *E. coli*, only when the lipid A molecules are tetra- or pentaacylated as it is in the case  
908 of  $\Delta lpxM$  *E. coli*<sup>55</sup>. *B. thetaiotaomicron* intrinsically expresses an *lpxF* ortholog (BT1854) which is  
909 responsible for the high level of resistance of this strain against Polymyxin B<sup>12</sup>. Prior to the surface  
910 charge measurements, cells were grown overnight in TYG (Tryptone Yeast Extract Glucose)  
911 medium<sup>57</sup> in anaerobic conditions. We grew all the strains in TYG medium to allow the  
912 comparability with *B. thetaiotaomicron*. Cells were washed twice with phosphate-buffered saline  
913 (PBS) then resuspended to a cell density of OD<sub>600</sub> = 1. Cells were incubated with 2  $\mu$ l of 5 mg/ml  
914 FITC-PLL and 100  $\mu$ l of 1  $\mu$ g/ml 4,6-diamidino-2-phenylindole (DAPI) for 10 minutes, followed by  
915 centrifugation (4500 rpm, 5'). DAPI was used in order to identify the live cells. Cells were washed  
916 twice with PBS then diluted 100-fold in 100  $\mu$ l of PBS and transferred into a black clear-bottom 96-  
917 well microplate (Greiner Bio-One). Prior to fluorescent microscopy analysis, cells were collected to  
918 the bottom of the plate by centrifugation (4500 rpm, 10'). Pictures were taken with a PerkinElmer  
919 Operetta microscope using a 60x high-NA objective to visualize the cells. Images of two channels  
920 (DAPI and FITC-PLL) were collected from ten sites of each well. Mean fluorescent intensity for  
921 each well was calculated using the Harmony® High Content Imaging and Analysis Software.  
922 Experiments were carried out in 4 biological replicates.

923



924 **Supplementary Figures**

925

926

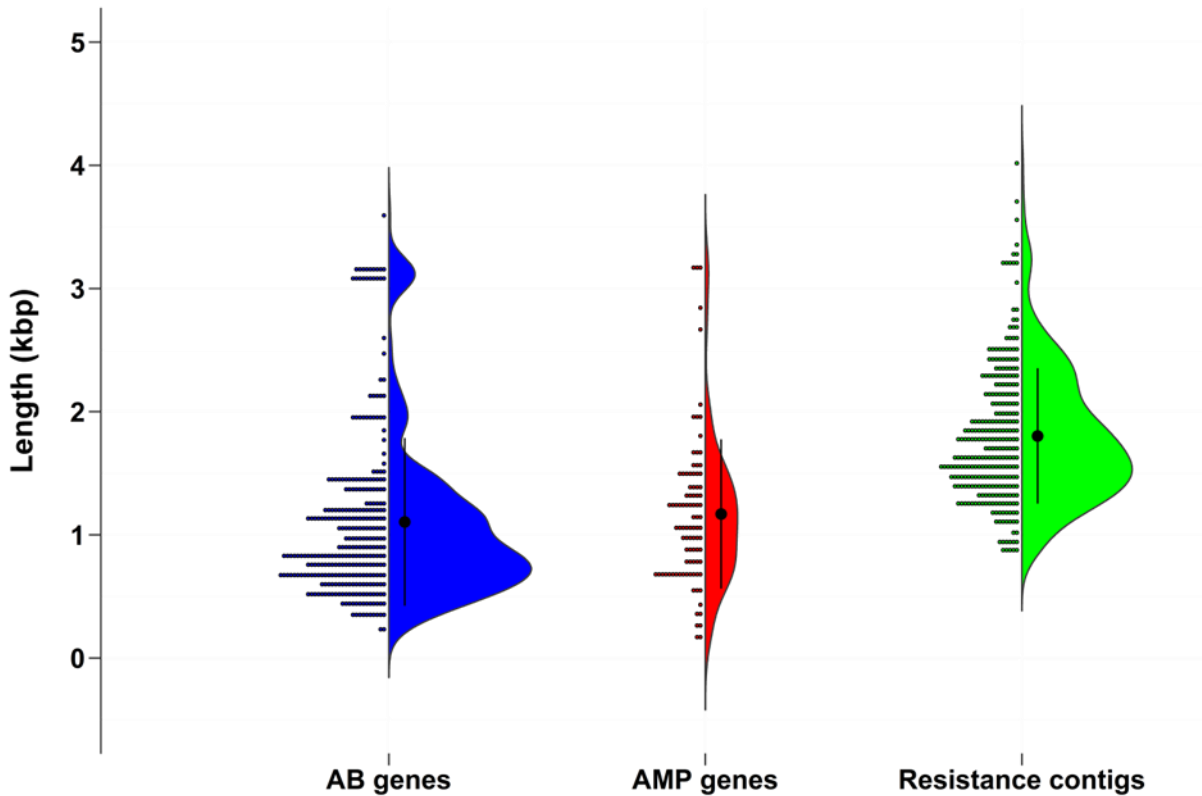

927

928

929

930

931

932

933

934

**Figure S1.** The length distributions of known antibiotic- and AMP-resistance genes are well within the fragment size range of the metagenomic library. Blue and red plots show the length (kilobase pair (kbp)) distribution of known antibiotic- and AMP-resistance genes, respectively, from a representative set of gut microbial genomes (Table S2). Green plot shows the length (kbp) distribution of all antibiotic- and AMP-resistance DNA fragments identified in our functional metagenomic selections (Table S4). The mean value and standard deviation are shown on the plots.

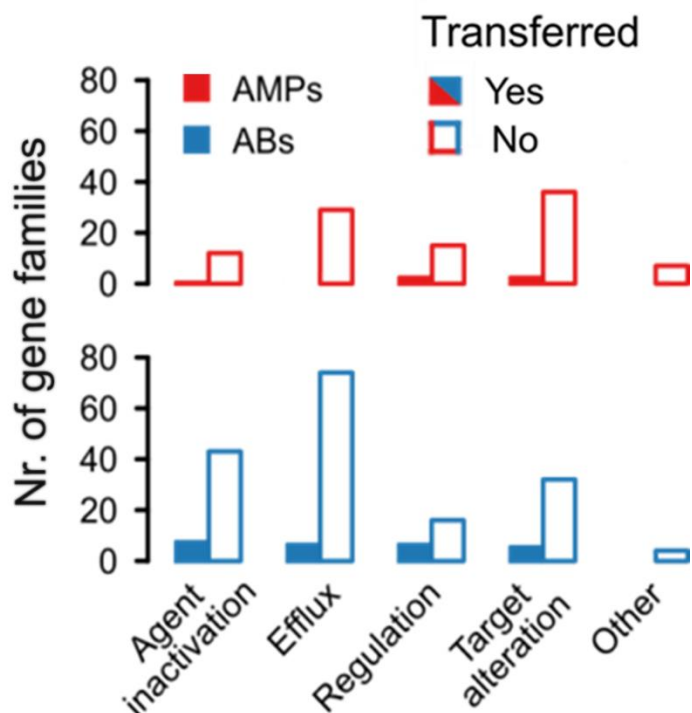

935

936 **Figure S2.** Presence (filled bars) / absence (empty bars) patterns of the known AMP- and  
937 antibiotic-resistance gene families on the metagenomic contigs identified in our functional  
938 selections. Genes were assigned to gene families (orthogroups) which were classified into major  
939 functional categories (see Methods). A gene family was considered present if at least one  
940 resistance gene from its orthogroup had a significant sequence similarity hit on the DNA fragments  
941 (see Methods). We considered a resistance gene family absent if the orthogroup did not result in  
942 any hits on the metagenomic contigs from the functional selections.  $n=200$  for ABs,  $n=105$  for  
943 AMPs.

944

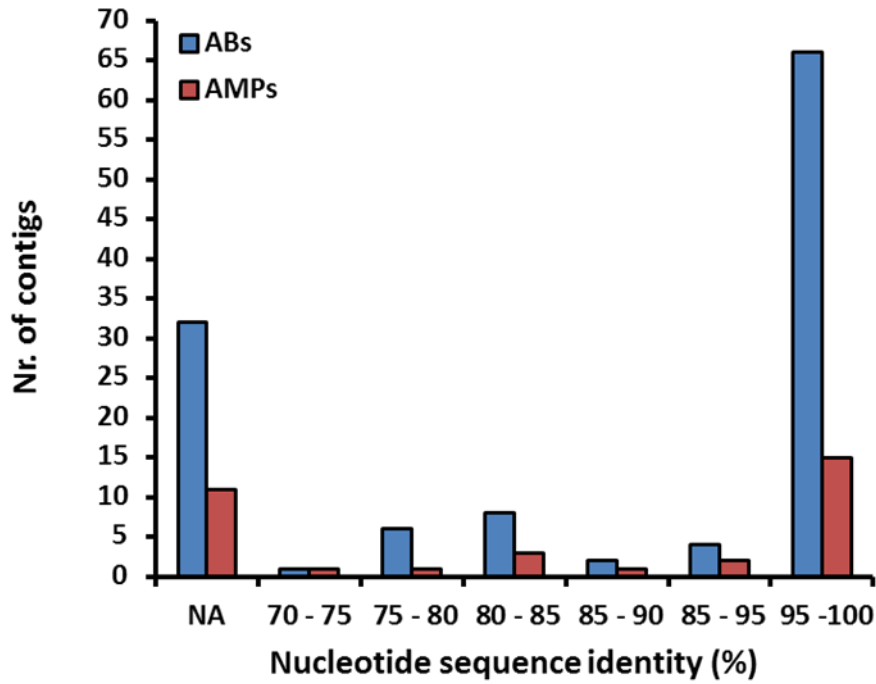

945

946

947

948

949

950

**Figure S3.** Distribution of the nucleotide sequence identities between the AMP/AB resistance contigs originating from the metagenomic libraries of the uncultured microbiota (Table S4) and the genome sequences from the Human Microbiome Project (see Methods). 28 % of the contigs (marked with NA) did not result in significant alignment to the genome sequences in the HMP database.  $n=119$  for ABs,  $n=33$  for AMPs.

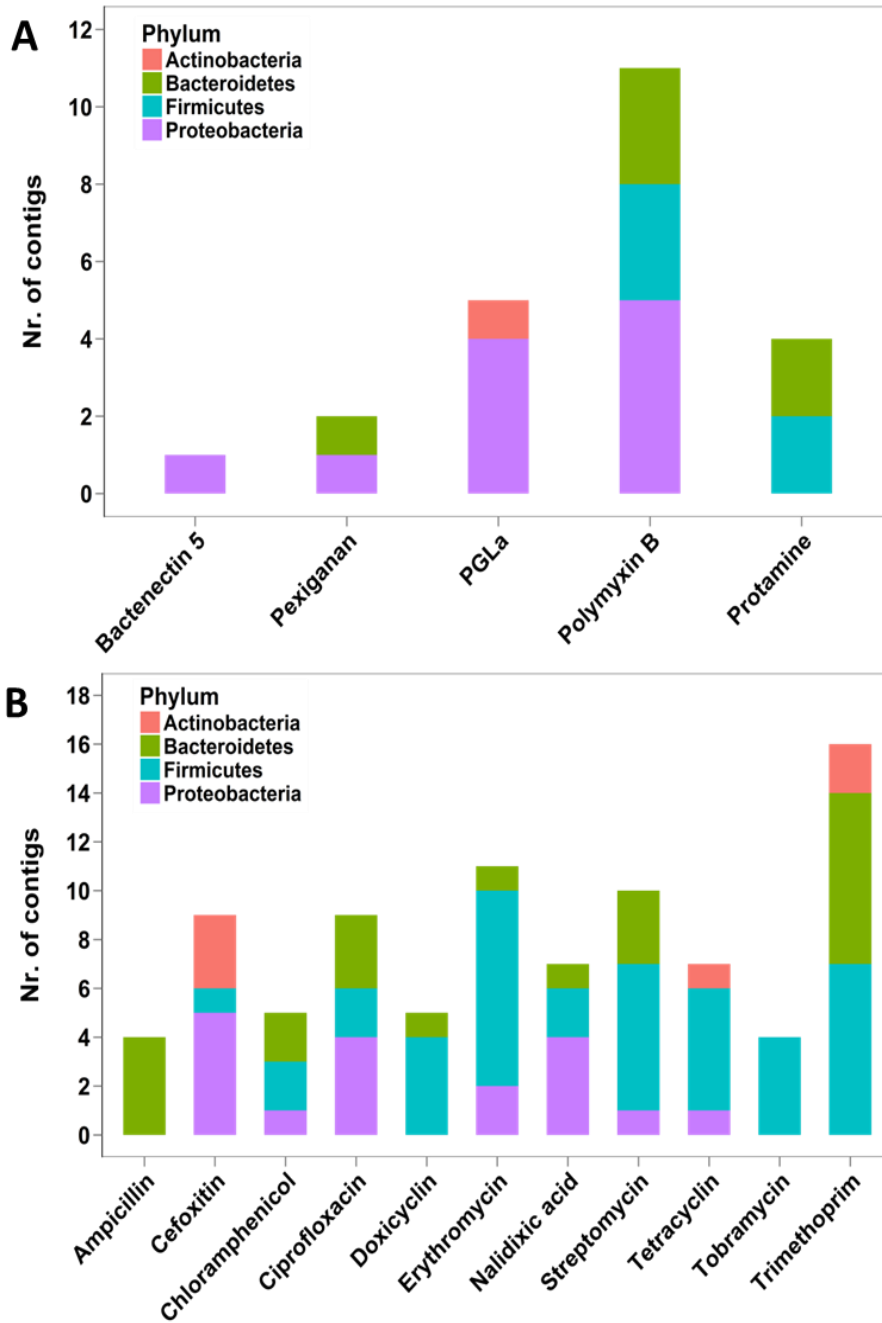

951

952 **Figure S4.** Phylum-level distribution of resistance contigs originating from the functional selection  
953 of the uncultured microbiota with different A) AMPs ( $n=23$ ) and B) antibiotics ( $n=87$ ) (Table S4).

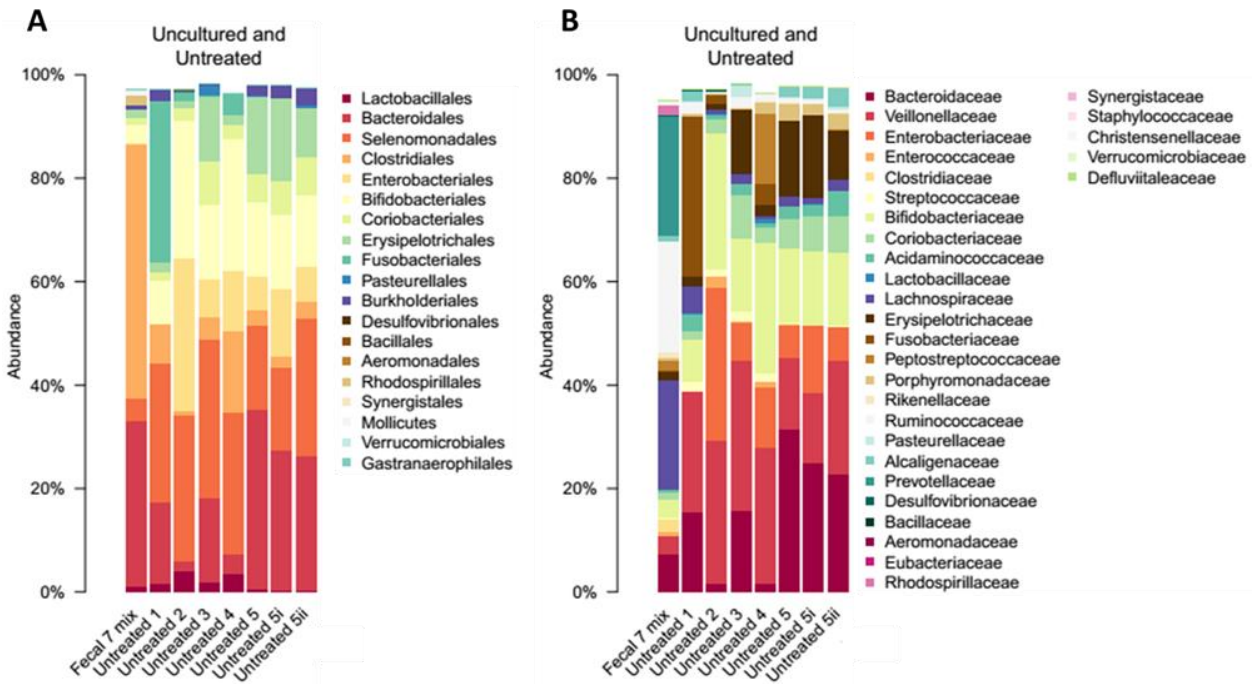

954

955

**Figure S5.** Percent abundances of bacterial orders (A) and families (B) in the uncultured (Fecal 7

956 mix) and anaerobically cultured (Untreated 1-5, 5i, 5ii) gut microbial samples from seven unrelated

957 healthy individuals. At order level, the cultivable proportion was 64-86 %, while at the family level it

958 was 65-74 %. These results are consistent with the cultivation efficiency reported in a previous

959 study<sup>26</sup>. “Untreated 1-5” samples are biological replicates started from different aliquots of the

960 same frozen samples in independent cultivation experiments. “Untreated 5i” and “Untreated 5ii” are

961 technical replicates of the “Untreated 5” sample started from the same sample and grown at the

962 same time in the same experiment. Data is presented in Table S5.

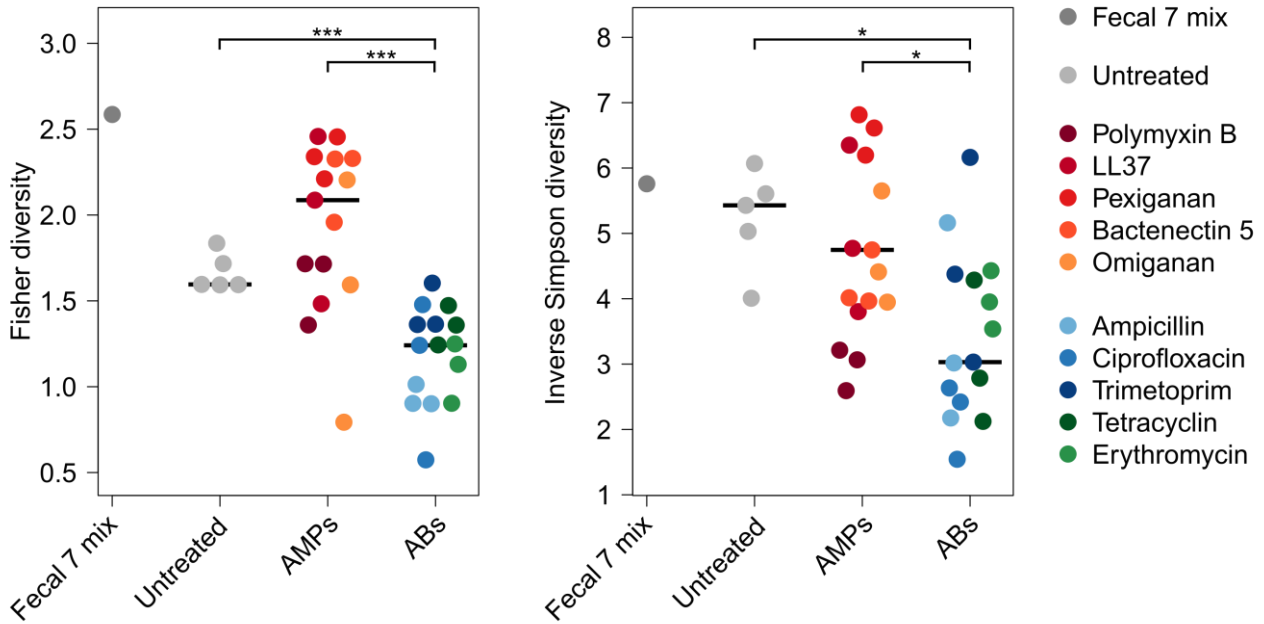

963

964 **Figure S6.** Diversities of the cultured microbiota and the original faecal sample (Fecal 7 mix).  
965 Fisher (A)<sup>58</sup> and Inverse Simpson (B)<sup>59</sup> alpha diversity indices were calculated at the bacterial  
966 family level. Alpha diversity reflects the number of different taxa and distribution of abundances.  
967 Asterisks indicate significant difference, Mann-Whitney U tests: \* indicates  $P < 0.05$ , \*\*\* indicates  $P$   
968  $< 0.001$ ,  $n=36$ . Central horizontal bars represent median values.

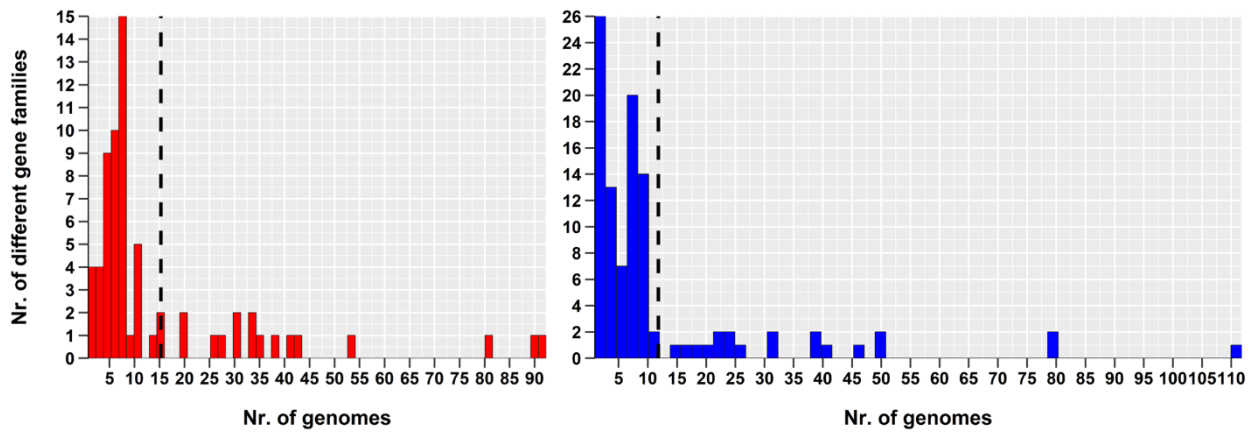

969 **Figure S7.** The diversity of previously described AMP- (red) and antibiotic resistance genes (blue)  
970 in a representative set of gut microbial genomes<sup>15</sup>. The dashed line represents the mean value.  
971 For details see the section “Comparing the prevalence of AMP- and antibiotic-resistance genes in  
972 gut microbial genomes”. ( $P < 10^{-16}$ , two-sided negative binomial regression,  $n=67$  (AMPs) and  
973  $n=102$  (ABs)).



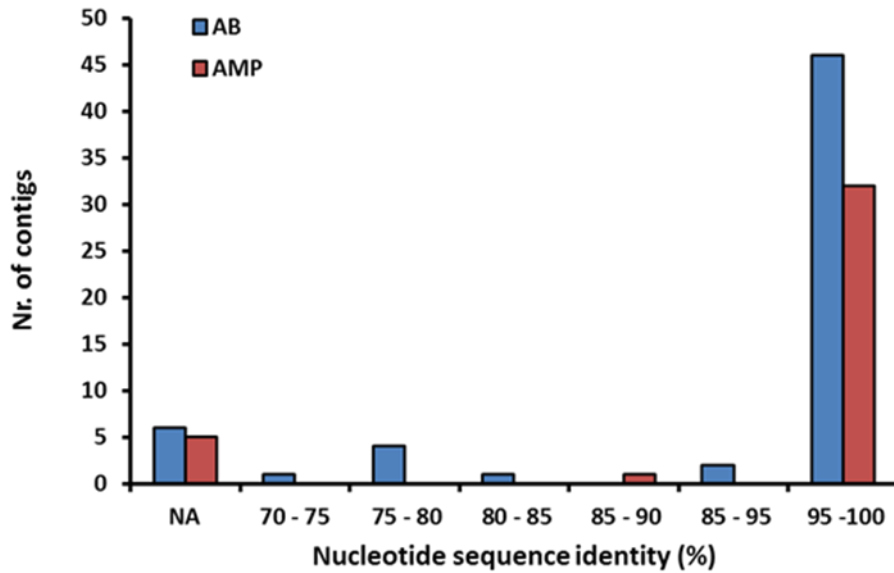

974

975 **Figure S8.** Distributions of the nucleotide sequence identities between the AMP/AB resistance  
976 contigs originating from the cultured microbiota and the genome sequences from the Human  
977 Microbiome Project (see Methods),  $n=60$  for ABs,  $n=38$  for AMPs (Table S8). 11 % of the contigs  
978 (marked with NA) did not result in significant alignment to the genome sequences in the HMP  
979 database.

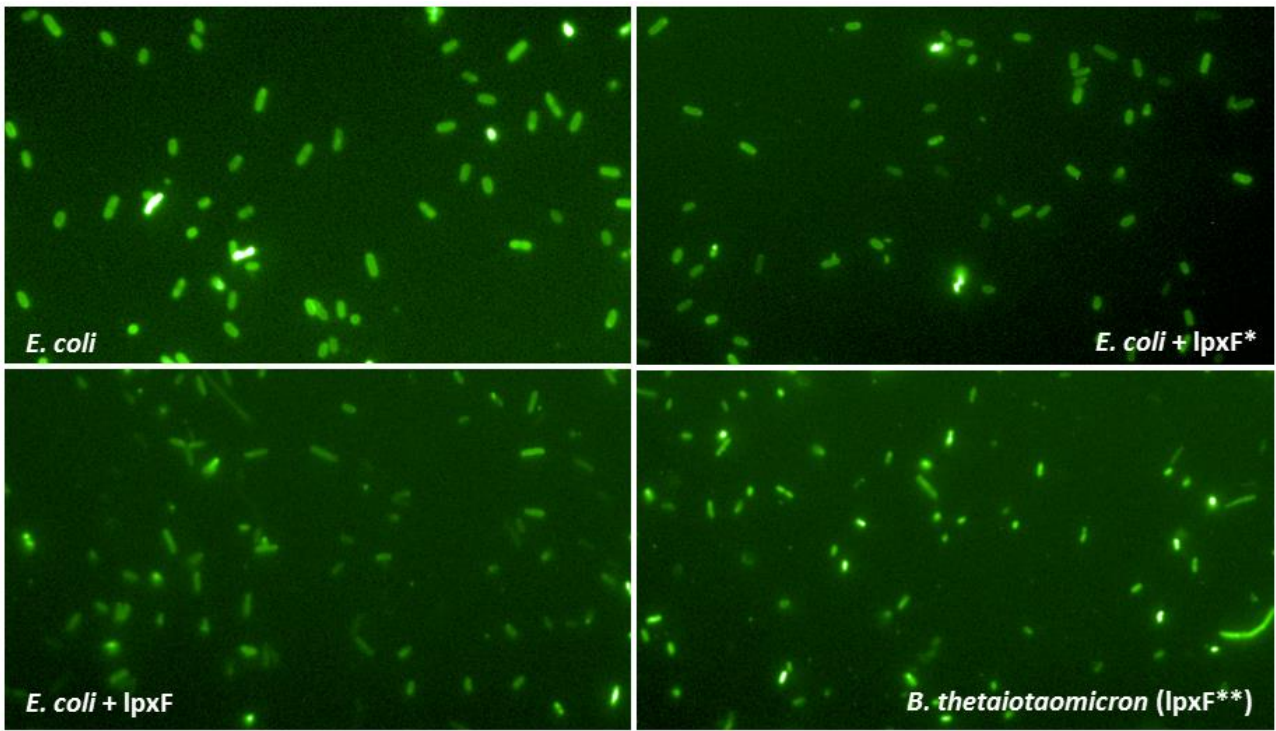

981 **Figure S9.** Microscopic images of cells incubated with FITC-labeled poly-L-lysine (PLL)  
982 polycationic molecules. The brighter are the cells the more PLL is bound, indicating a more  
983 negative outer membrane surface charge. For details see “Surface charge measurement” section  
984 in Supplementary methods. The quantitative analysis of the fluorescent signals is presented in  
985 Figure 4B. Abbreviations: *E. coli* = BW25113  $\Delta lpxM^*$ . *E. coli* + *lpxF* = *E. coli* expressing an ortholog  
986 gene of *lpxF* from *Parabacteroides merdae* ATCC 43184. This gene was identified in our  
987 metagenomic screen (see Table 1). *E. coli* + *lpxF*\* = *E. coli* expressing the *LpxF* of *Francisella*  
988 *tularensis* subsp. *novicida*. *B. thetaiotaomicron* (*lpxF*\*\*\*) = *Bacteroides thetaiotaomicron* strain,  
989 which intrinsically expresses the *lpxF* BT1854 gene. <sup>‡</sup>In BW25113  $\Delta lpxM$  strain the *lpxM* gene is  
990 deleted and therefore this strain has pentaacylated lipid-A molecules instead of the hexaacylated  
991 ones<sup>60</sup>. We used this strain to allow the phenotypic comparison of *LpxF* to the *LpxF* from  
992 *Francisella tularensis*, which can be expressed only in  $\Delta lpxM$  *E. coli* background that has  
993 pentaacylated LPS molecules ( $n=4$ ).

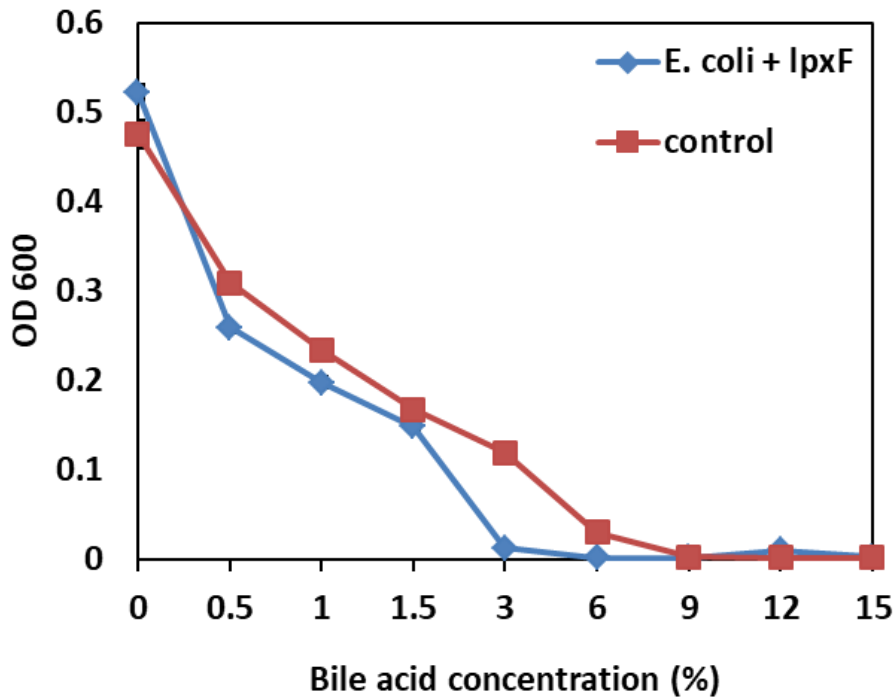

994

995 **Figure S10.** The expression of the *lpxF* ortholog gene from *Parabacteroides merdae* ATCC 43184  
996 (see Table 1.) increases the sensitivity of *E.coli* to bile acid, a membrane-damaging agent.  
997 Abbreviations: E. coli + lpxF - *E. coli* BW25113 expressing the *lpxF* ortholog gene from  
998 *Parabacteroides merdae* ATCC 43184 identified during the functional selection of the  
999 metagenomic libraries against polymyxin B, control - *E. coli* BW25113 harbouring the library vector  
1000 with a random metagenomic DNA insert which does not influence resistance against AMPs or  
1001 antibiotics ( $n=3$ ).

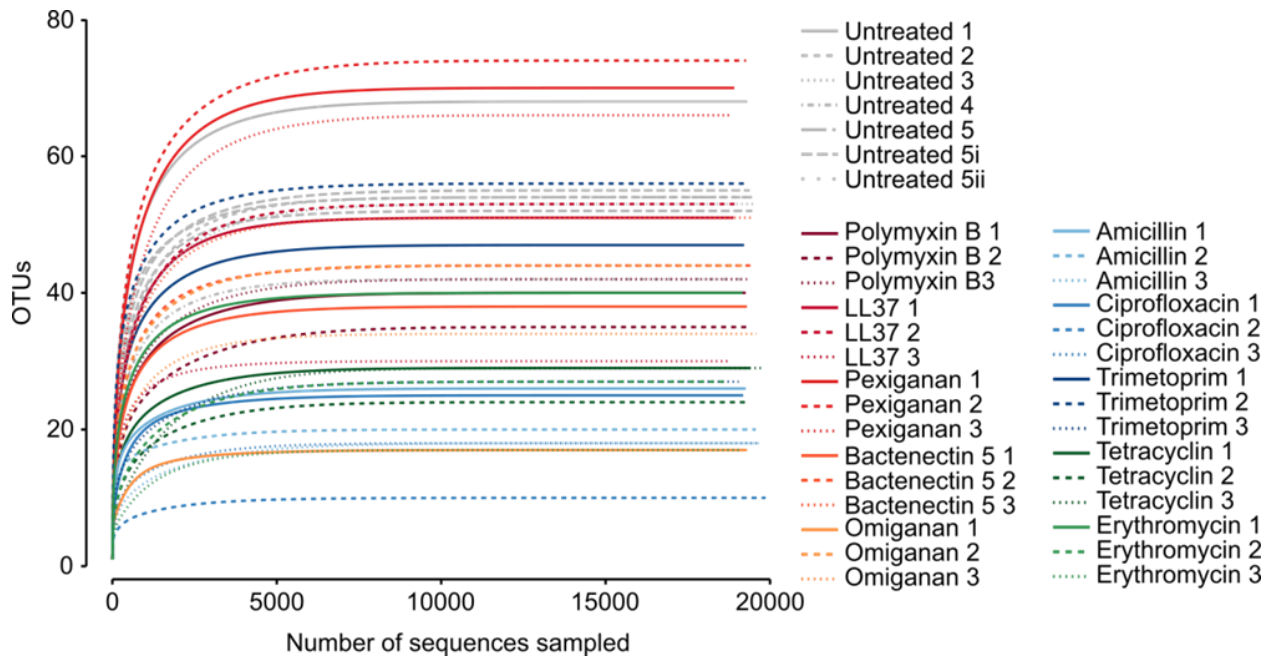

1002

1003 **Figure S11.** Rarefaction OTU ('species') richness curves. Curves are plots of the number of OTUs  
1004 as a function of the number of sequences, for different samples. At a sample size of 10,000  
1005 sequences, all curves reach their plateau, indicating that sufficient sequences were used to  
1006 estimate the number of OTUs in different samples.

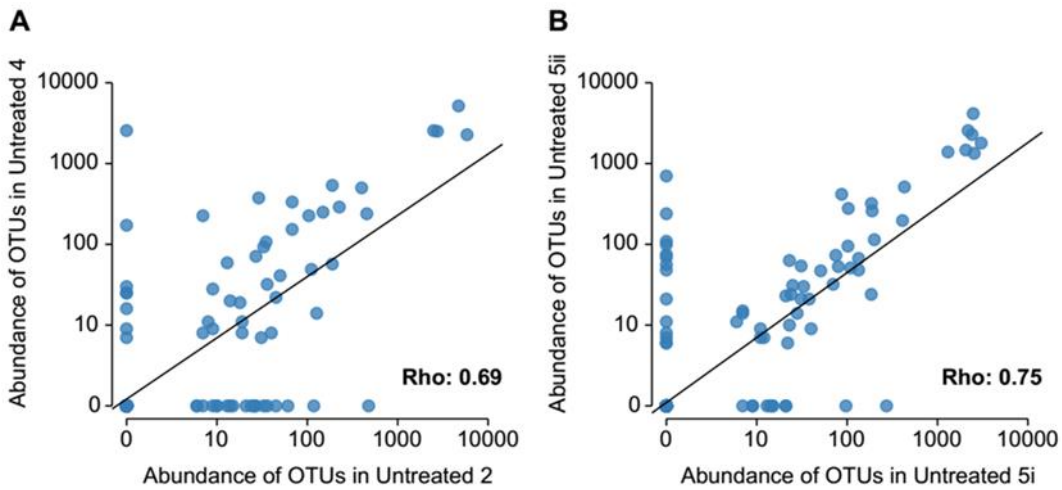

1007

1008 **Figure S12.** OTUs abundances correlate across biological (A) and technical (B) replicates of  
1009 cultivated, untreated samples, showing good reproducibility of the replicates. Spearman's rho is  
1010 0.69 (A) and 0.79 (B), respectively. Points represent individual OTUs.  $n=2$ , Untreated 2 and 4  
1011 samples are biological replicates, while Untreated 5i and 5ii are technical replicates. Biological  
1012 replicates originate from independent cultivation experiments starting from different aliquots of the  
1013 same frozen samples. Technical replicates originate from parallel cultivations starting from the  
1014 same sample and grown at the same time.

1015

1016 **Table S1.** A comprehensive catalogue of previously reported AMP resistance genes compiled  
1017 based on literature mining and of antibiotic resistance genes from the CARD database<sup>35</sup>. The table  
1018 is provided as a separate Excel file.

1019

1020 **Table S2.** Identification of the AMP- and antibiotic-resistance genes in the mobile gene pool and in  
1021 the genomes from which the mobile gene pool was derived. The table is provided as a separate  
1022 Excel file.

1023  
1024  
1025

**Table S3.** List and characteristics of antimicrobials used in this study. The origin of the antimicrobial peptides is indicated in brackets and the peptides marked with asterisks are involved in clinical trials.

| <b>Antimicrobials</b>                              | <b>Mode of action</b>                              | <b>Used in</b>                                        |
|----------------------------------------------------|----------------------------------------------------|-------------------------------------------------------|
| <b><u>ANTIMICROBIAL PEPTIDES (AMPS)</u></b>        |                                                    |                                                       |
| <b>Cecropin P1 (parasitic nematode)</b>            | pore-forming activity                              | Functional metagenomics, culturing the gut microbiota |
| <b>Bactenectin 5 (cow)</b>                         | intracellular targets                              | Functional metagenomics, culturing the gut microbiota |
| <b>Indolicidin (cow)</b>                           | pore-forming activity, inhibition of DNA synthesis | Functional metagenomics                               |
| <b>LL37 (human)</b>                                | pore-forming activity, membrane depolarization     | Functional metagenomics, culturing the gut microbiota |
| <b>Omiganan* (synthetic, indolicidin analogue)</b> | pore-forming activity, inhibition of DNA synthesis | Functional metagenomics, culturing the gut microbiota |
| <b>Pexiganan* (synthetic, magainin analogue)</b>   | pore-forming activity                              | Functional metagenomics, culturing the gut microbiota |
| <b>PGLa (frog)</b>                                 | pore-forming activity                              | Functional metagenomics                               |
| <b>Polymyxin B (bacterial)</b>                     | pore-forming activity, membrane depolarization     | Functional metagenomics, culturing the gut microbiota |
| <b>PR-39 (pig)</b>                                 | inhibition of DNA and protein synthesis            | Functional metagenomics                               |
| <b>Protamine (salmon)</b>                          | intracellular targets                              | Functional metagenomics                               |
| <b>R8 (synthetic)</b>                              | pore-forming activity                              | Functional metagenomics                               |
| <b>Tachiplesin II (horseshoe crab)</b>             | pore-forming activity, membrane depolarization     | Functional metagenomics                               |
| <b><u>ANTIBIOTICS (ABS)</u></b>                    |                                                    |                                                       |
| <b>Ampicillin</b>                                  | inhibition of cell wall synthesis                  | Functional metagenomics, culturing the gut microbiota |



|                        |                                   |                                                       |
|------------------------|-----------------------------------|-------------------------------------------------------|
| <b>Cefoxitin</b>       | inhibition of cell wall synthesis | Functional metagenomics                               |
| <b>Ciprofloxacin</b>   | inhibition of DNA synthesis       | Functional metagenomics, culturing the gut microbiota |
| <b>Chloramphenicol</b> | inhibition of protein synthesis   | Functional metagenomics                               |
| <b>Doxycycline</b>     | inhibition of protein synthesis   | Functional metagenomics                               |
| <b>Erythromycin</b>    | inhibition of protein synthesis   | Functional metagenomics, culturing the gut microbiota |
| <b>Nalidixic acid</b>  | inhibition of DNA synthesis       | Functional metagenomics                               |
| <b>Streptomycin</b>    | inhibition of protein synthesis   | Functional metagenomics                               |
| <b>Tetracycline</b>    | inhibition of protein synthesis   | Functional metagenomics, culturing the gut microbiota |
| <b>Tobramycin</b>      | inhibition of protein synthesis   | Functional metagenomics                               |
| <b>Trimethoprim</b>    | inhibition of folate synthesis    | Functional metagenomics, culturing the gut microbiota |

1026

1027

1028

1029 **Table S4.** List of resistance contigs identified from the functional metagenomics selections of the  
1030 uncultured microbiota with 12 AMPs and 11 small-molecule antibiotics (Table S3). The table is  
1031 provided as a separate Excel file.

1032

1033 **Table S5.** Bacterial abundances at family and order levels in the untreated and AMP/antibiotic  
1034 resistant microbiota. Abundances at order and family levels are presented on separate Excel  
1035 sheets. The table is provided as a separate Excel file.

1036 **Table S6.** Selection conditions used for the anaerobic cultivation experiments. Those AMP/AB  
1037 treatment concentrations were chosen where the average proportion of the resistant colonies  
1038 originating from three selection concentrations per AMP/AB ranged from 0.01 to 0.1 % of the total  
1039 cultivable colony number in the absence of any antimicrobial. Trimethoprim represented an  
1040 exception, where the resistant fraction was slightly higher, but the concentration could not be  
1041 raised further because of solubility issues.

| Antimicrobial peptide (AMP) / antibiotic (AB) | Selection concentration (µg/ml) | Treatment type | Relative resistance level of the gut microbiota* | Resistant colonies (percentage of the cultivable cell population) |
|-----------------------------------------------|---------------------------------|----------------|--------------------------------------------------|-------------------------------------------------------------------|
| <b>Bactenectin 5</b>                          | 666.7                           | AMP            | 6.7                                              | 0.02                                                              |
| <b>LL37</b>                                   | 1400                            | AMP            | 10                                               | 0.02                                                              |
| <b>Omiganan</b>                               | 250                             | AMP            | 8.3                                              | 0.04                                                              |
| <b>Pexiganan</b>                              | 166.7                           | AMP            | 16.7                                             | 0.01                                                              |
| <b>Polymyxin B</b>                            | 280                             | AMP            | 1400                                             | 0.1                                                               |
| <b>Ampicillin</b>                             | 700                             | AB             | 46.7                                             | 0.1                                                               |
| <b>Ciprofloxacin</b>                          | 75                              | AB             | 833.3                                            | 0.03                                                              |
| <b>Erythromycin</b>                           | 1600                            | AB             | 40                                               | 0.04                                                              |
| <b>Tetracycline</b>                           | 48                              | AB             | 26.7                                             | 0.1                                                               |
| <b>Trimetoprim</b>                            | 1200                            | AB             | 1500                                             | 0.49                                                              |

1042

1043

1044

1045  
1046

**Table S7.** Characteristics of metagenomic libraries constructed from AMP- and antibiotic-resistant microbiota cultures with established microbial compositions.

| <b>Antimicrobial peptide (AMP) / antibiotic (AB)</b> | <b>Library name</b> | <b>Library size (Gbp)</b> | <b>Average insert size (bp)</b> | <b>Treatment type</b> |
|------------------------------------------------------|---------------------|---------------------------|---------------------------------|-----------------------|
| <b>Bactenectin 5</b>                                 | BAC5_1              | 2.2                       | 2700                            | AMP                   |
| <b>Bactenectin 5</b>                                 | BAC5_2              | 1.8                       | 2600                            | AMP                   |
| <b>LL37</b>                                          | LL37_1              | 1.736                     | 2800                            | AMP                   |
| <b>LL37</b>                                          | LL37_2              | 4.833                     | 4833                            | AMP                   |
| <b>Omiganan</b>                                      | OMG_1               | 0.8                       | 1000                            | AMP                   |
| <b>Omiganan</b>                                      | OMG_2               | 0.96                      | 1600                            | AMP                   |
| <b>Pexiganan</b>                                     | PEX_1               | 1.658                     | 1658                            | AMP                   |
| <b>Pexiganan</b>                                     | PEX_2               | 7.5506                    | 1900                            | AMP                   |
| <b>Polymyxin B</b>                                   | PMB_1               | 2.4464                    | 3058                            | AMP                   |
| <b>Polymyxin B</b>                                   | PMB_2               | 1.6                       | 1600                            | AMP                   |
| <b>Ampicillin</b>                                    | AMP_1               | 1.02                      | 1700                            | AB                    |
| <b>Ampicillin</b>                                    | AMP_2               | 0.884                     | 1300                            | AB                    |
| <b>Ciprofloxacin</b>                                 | CPR_1               | 0.594                     | 1100                            | AB                    |
| <b>Ciprofloxacin</b>                                 | CPR_2               | 1.3325                    | 2050                            | AB                    |
| <b>Erythromycin</b>                                  | ERY_1               | 0.6                       | 1600                            | AB                    |
| <b>Erythromycin</b>                                  | ERY_2               | 2.1692                    | 3190                            | AB                    |
| <b>Tetracyclin</b>                                   | TET_1               | 0.174563                  | 3675                            | AB                    |
| <b>Tetracyclin</b>                                   | TET_2               | 3.2                       | 4000                            | AB                    |
| <b>Trimetoprim</b>                                   | TRM_1               | 1.5                       | 2300                            | AB                    |
| <b>Trimetoprim</b>                                   | TRM_2               | 2.56074                   | 3283                            | AB                    |

1047

1048

1049

1050 **Table S8.** List of resistance contigs identified from the functional selection of the cultured  
 1051 microbiota with 5 AMPs and 5 small-molecule antibiotics (Table S3). The table is provided as a  
 1052 separate Excel file.

1053

1054 **Table S9.** Phylum-level distributions of the AMP- and antibiotic-resistant microbiota and the  
 1055 transferring resistance contigs originating from them. Count data represent either colony numbers  
 1056 from the culturing experiments estimated by using the 16S rRNA abundance data (Table S5) or  
 1057 the number of resistance contigs detected in the functional metagenomics screens. The data was  
 1058 used for logistic regression analyses to determine if the phylum-level representation of resistance  
 1059 contigs are proportional to that of the cultured microbiota (see Methods).

| Phylum                | Source                     | Treatment | Count |
|-----------------------|----------------------------|-----------|-------|
| <b>Proteobacteria</b> | Transferred DNA contig     | AMP       | 18    |
| <b>Proteobacteria</b> | Transferred DNA contig     | AB        | 3     |
| <b>Proteobacteria</b> | Gut bacteria colony number | AMP       | 5590  |
| <b>Proteobacteria</b> | Gut bacteria colony number | AB        | 1838  |
| <b>Firmicutes</b>     | Transferred DNA contig     | AMP       | 5     |
| <b>Firmicutes</b>     | Transferred DNA contig     | AB        | 17    |
| <b>Firmicutes</b>     | Gut bacteria colony number | AMP       | 14734 |
| <b>Firmicutes</b>     | Gut bacteria colony number | AB        | 11402 |
| <b>Bacteroidetes</b>  | Transferred DNA contig     | AMP       | 8     |
| <b>Bacteroidetes</b>  | Transferred DNA contig     | AB        | 30    |
| <b>Bacteroidetes</b>  | Gut bacteria colony number | AMP       | 1050  |
| <b>Bacteroidetes</b>  | Gut bacteria colony number | AB        | 8077  |
| <b>Actinobacteria</b> | Transferred DNA contig     | AMP       | 0     |
| <b>Actinobacteria</b> | Transferred DNA contig     | AB        | 4     |
| <b>Actinobacteria</b> | Gut bacteria colony number | AMP       | 647   |
| <b>Actinobacteria</b> | Gut bacteria colony number | AB        | 2868  |
| <b>Fusobacteria</b>   | Transferred DNA contig     | AMP       | 0     |
| <b>Fusobacteria</b>   | Transferred DNA contig     | AB        | 0     |
| <b>Fusobacteria</b>   | Gut bacteria colony number | AMP       | 630   |
| <b>Fusobacteria</b>   | Gut bacteria colony number | AB        | 151   |

1060

1061

1062

1063

1064 **Table S10.** Resistance gains in *E. coli* and *S. enterica* provided by a representative set of plasmids  
1065 carrying AMP/antibiotic resistance contigs that were isolated in our metagenomic screens. The  
1066 table is provided as a separate Excel file.

1067

1068 **Table S11.** List of primers used in this study. The table is provided as a separate Excel file.
